# Supplementary material for: Beyond biodiversity: the role of Paramuricea clavata forests in supporting ecosystem functioning
Source: Research Square preprint supplement (doi:10.21203/rs.3.rs-6277481/v1), 2025-04-18
Supplement: Supplementary file 1 [file 400b78be95c4b5f2ba65c5e8.xlsx]

## Sheet: Taxonomic structure_SP
Species	Agelas.oroides	Aglaophenia.spp	Amphiroa.complex	Aplysina.cavernicola	Axinella.damicornis	Axinella.spp	Axinella.vaceleti	Axinella.verrucosa	Botryocladia.botryoides	Bugula.sp	Caryophyllia.smithii	Caulerpa.cylindracea	Cerianthus.membranaceus	Chondrilla.nucula	Chondrosia.reniformis	Clathrina.clathrus	Clavelina.dellavallei	Clavelina.sp	Cliona.celata	Cliona.viridis	Codium.bursa	Colpomenia.sp	Crella.elegans	Crella.pulvinar	Dictyopteris.polypodioides	Dictyotales	Didemnum.sp	Diplosoma.spongiforme	Disydea.fragilis	Dysidea.avara	Encrusting.ascidians	Encrusting.bryozoans	Encrusting.Calcified.Rhodophyta	Encrusting.red.sponges	Encrusting.sponges.1	Encrusting.sponges.10	Encrusting.sponges.2	Encrusting.sponges.3	Encrusting.sponges.4	Encrusting.sponges.5	Encrusting.sponges.6	Encrusting.sponges.7	Encrusting.sponges.8	Encrusting.sponges.9	Eudendrium.sp	Eunicella.cavolini	Filamentous.green.algae	Filograna.implexa	Flabellia.petiolata
IMG_0757	0	0	0	0	0	0	0	0	0	0	0	0	0	0	1.7	0	0	0	0	0	0	0	0	0	0	0	0.15	0	1.21	0	0	0	4.95	1.89	0	0	0	0	0	0	0	0	0	0	0	0.98	0	0	0
IMG_0758	0	0	0	0	0	0	0	0	0	0	0	0	0	0	0	0	0	0	0	0	0	0	0	0.54	0	0	0	0	0.13	0	0.09	0	1.67	0.39	0	0	0	0	0	0	0	0	0	0	0	3.55	0	2.09	0
IMG_0759	0	0	0	0	0	0	0	0	0	0	0	0	0	0	0	0	0	0	0	0	0	0	0	0	0	0	0	0	0	0	0	0	6.25	0.76	0	0	0	0	0	0	0	0	0	0	0	3.9	0	0	0
IMG_0761	0	0	0	12.14	0	0	0	0.1	0	0	0	0	0	0	0	0	0.88	0	0	0	0	0	0	0	0	0	0	0	0	0	0	0	8.45	0.99	0	0	0	0	0	0	0	0	0	0	0	1.41	0	0.14	0
IMG_0764	0	0	0	0	0	0	0	0	0	0	0	0	0	0	0	0	1.43	0	0	0	0	0	0	0	0	0	0	0	0	0	0	0	3.67	0.95	0	0	0	0	0	0	0	0	0	0	0	0.79	0	0	0
IMG_0766	0	0	0	0	0	0	0	0	0	0	0	0	0	0	0	0	0.76	0	0	0	0	0	0	0	0	0	0	0	0	0	0	0	2.29	2.4	0	0	0	0	0.16	0	0	0	0	0	0	2.98	0	0.48	0
IMG_0769	0	0	0	0	0	0	0	0	0	0	0	0	0	0	0	0	1.05	0	0	0	0	0	0	0	0	0	0	1.07	1.96	0	0	0	21	0	0	0	0	0	1.29	0	0	0	0	0	0	0.62	0	0.32	0
IMG_0772	0	0	0	0	0	0.08	0	0	0	0	0	0	0	0	0	0	0.39	0	0	0	0	0	0	0	0	0.36	0	0	0	0	0	0	3.97	0.79	0	0	0	0	0	0	0	0	0	0	0	0	0	0	0
IMG_0773	0	0	0	0	0	0	0	2	0	0	0	0	0	0	0	0	0	0	0	0	0	0	0	0	0	0	0	0	0	0	0	0	12.51	0	0	0	0	0	0	0	0	0	0	0	0	0	0	0	0
IMG_0775	5.26	0	0	0	0	0.53	0	0	0	0	0	0	0	0	0	0	0.6	0	0	0	0	0	0	0.32	0	0	0.5	0	0	0	0	0	10.8	0.35	0	0	0	0	0.7	0	0	0	0	0	0	0.27	0	0	0
IMG_0813	0	0	0	0	0	0	0	0	0	0	0	0	0	0	0	0	0	0	0	0	0	0	0	0	0	0.34	0	0	0	0	0	0	4	0	0	0	0	0	0	0	0	0	0	0	0	0.13	0	0	0
IMG_0814	0	0	0	0	0	0	0	0	0	0	0	0	0	0	0	0	0	0	0	0	0	0	0	0	0	1.13	0	0	0	0	0	0	2.38	0	0	0	0	0	0	0	0	0	0	0	0	0.07	0	0	0
IMG_0816	0	0	0	0	0	0	0	0	0	0	0	0	0	0	0	0	0	0	0	0	0	0	0	0	0	0.7	0	0	0	0	0	0	21.98	0.48	0	0	0	0	0	0	0	0	0	0	0	0.18	0	0	0
IMG_0817	0	0	0	0	0	0	0	0	0	0	0	0	0	0	0	0	0	0	0	0	0	0	0	0	0	0.23	0	0	0	0	0	0	9	0	0	0	0	0	0	0	0	0	0	0	0	0	0	0	0
IMG_0818	0	0	0	0	0	0	0	0	0	0	0	0	0	0	0	0	0	0	0	0	0	0	0	0	0	0	0	0	0	0	0	0	4	0	0	0	0	0	0	0	0	0	0	0	0	0	0	0	0
IMG_0819	0	0	0	0	0	0	0	0	0	0	0	0	0	0	0	0	0	0	0	0	0	0	0	0	0	2.66	0	0	0	0	0	0	23.23	0.17	0	0	0	0	0	0	0	0	0	0	0	0.66	0	0	0
IMG_0820	0.77	0	0	0	0	0	0	0	0	0	0	0	0	0	0	0	0	0	0	0	0	0	0	0	0	2.59	0	0	0	0	0	0	27.68	0	0	0	0	0	0	0	0	0	0	0	0	0	0	0	0
IMG_0821	0	0	0.35	0	0	0	0	0	0	0	0	0	0	0	0	0	0.45	0	0	0	0	0	0	0	0	0.31	0	0	0	0	0	0	41.86	0	0	0	0	0	0	0	0	0	0	0	0	0.25	0	0	0
IMG_0822	0	0	0	0	0	0	0	0	0	0	0	0	0	0	0	0	0	0	0	0	0	0	0	0	0	0.68	0	0	0	0	0	0	6.93	0	0	0	0	0	0	0	0	0	0	0	0	0	0	0	0
IMG_0823	0	0	0	0	0	0	0	0	0	0	0	0	0	0	0	0	0	0	0	0	0	0	0	0	0	1.62	0	0	0	0	0	0	12.96	0	0	0	0	0	0	0	0	0	0	0	0	0	0	0	0
IMG_0843	0	0	0	0	0	0	0	0	0	1.09	0	0	0	0	0	0	0	0	0	0	0	0	0	0	0.32	0	0	0	0	0	0	0	38.12	0	0	0	0	0	0	0	0	0	0	0	0	0	0	0	0
IMG_0845	0	0	0	0	0	0	0	0	0	0	0	0	0	0	0	0	0	0	0	0	0	0	0	0	0	0.77	0	0	0	0	0	0	18	0	0	0	0	0	0	0	0	0	0	0	0	0	0	0	0
IMG_0847	0	0	0	0	0	0	0	0	0	0	0	0	0	0.1	0	0	0	0	0	0	0	0	0	0	0	0	0	0	0	0	0	0	0.3	0	0	0	0	0	0	0	0	0	0	0	0	0	0	0	0
IMG_0850	0	0	0	0	0	0	0	0	0	0	0	0	0	2.2	0	0	0	0	0	0	0	0	0	0	0	0	0	0	0	0	0	0	13.7	0.14	0	0	0	0	0	0	0	0	0	0	0	0	0	0	0
IMG_0852	0	0	0	0	0	0	0	0	0	0	0	0	0	0.23	0	0	0	0	0	0	0	0	0	0	0	0	0	0	0	0	0	0	30	0.04	0	0	0	0	0	0	0	0	0	0	0	0	0	0	0
IMG_0854	0	0	0	0	0	0	0	0	0	0.66	0	0	0	0	0	0	0	0	0	0	0	0	0	0	0	0	0	0	0	0	0	0	25	0	0	0	0	0	0	0	12	0	0	0	0.4	0	0	0	0
IMG_0856	0	0	0	0	8	0	0	0	0	0	0	0	0	0	0	0	0	0	0	0	0	0	0	0	0	0	0	0	0	0	0	0	35	1.01	0	0	0	0	0	0	0	0	0	0	0	0	0	0	0
IMG_0857	0	0	0	0	0	0	0	2.23	0	0	0	0	0	0	0	0	0	0	0	0	0	0	0	0	0	0.1	0	0	0	0	0	0.07	13.1	0	0	0	0	0	0.55	0	4.71	0	0	0	0	0	0	0	0
IMG_0862	0	0	0	0	0	0	0	0	0	1.47	0	0	0	0.63	0	0	0	0	0	0	0	0	0	0	0	0.28	0	0	0	0	0	0	40	0.27	0	0	0	0	0.4	0	0	0	0	0	0	0	0	0	0
IMG_0863	0	0	0	0	0	0	0	0	0	0	0	0	0	1.25	0	0	0	0	0	0	0	0	0	0	0	0	1.28	0	0	0	0	0	10	0	0	0	0	0	0	0	0	0	0	0	0	0	0	0	0
IMG_0913	0	0	0	0	0	0	0	0	0	0.43	0	0	0	0.41	0	0	0	0	0	0	0	0	0	0	0	0	0	0	0	0	0	0	1	1.94	0	0	0	0	0	0	0	0	0	0	0	0	0	0	1
IMG_0914	6.02	0	0	0	0	0	0	0	0	0	0	0	0	0	0	0	0	0	0	0	0	0	0	0	0	0.2	0	0	0	0	0	0	1.3	0.8	0	0	0	0	0	0	0	0	0	0	0	0	0	0	3
IMG_0917	0.6	0	0	0	0	0	0	0	0	0	0	0	0	0	0	0	0	0	0	0	0	0	0	0	0	0	0	0	0	0	0	0	2.4	0	0	0	0	0	0.12	0	0	0	0	0	0	0	0	0	1.8
IMG_0918	0	0	0	0	0	0	0	0	0	0	0	0	0	0	0	0	0	0	0	0	0	0	0	0	0	0	0	0	0	0	0	0	1.8	3.26	0	0	0	0	0	0	0	0	0	0	0	0	0	0	0
IMG_0920	3.06	0	0	0	0	0	0	0	0	0	0	0	0	0	0	0	0	0	0	0	0	0	0	0	0	0	0	0	0	0	0	0	1.7	0.41	0	0	0	0	0	0	0	0	0	0	0	0	0	0	0
IMG_0922	0	0	0	0	0	0	0	0	0	0	0	0	0	0	0	0	0	0	0	0	0	0	0	0	0	0	0	0	0	0	0	0	2.04	0	0	0	0	0	0	0	0	0	0	0	0	0	0	0	4.68
IMG_0924	2.43	0	0	0	0	0.25	0	0	0	0	0	0	0	0	0	0	0	0	0	0	0	0	0	0	0	4	0	0	0	0	0	0	1	1	0	0	0	0	0	0	0	0	0	0	0	0	0	0	0
IMG_0931	2.16	0	0	0	0	0	0	1.32	0	0	0	0	0	0	0	0	0	0	0	0	0	0	0	0	0	0	0	0	0	0	0	0	4	1.4	0	0	0	0	0	0	0	0	0	0	0	0	0	0	0.4
IMG_0932	0	0	0	0	0	0	0	1.72	0	0	0	0	0	0	0	0	0	0	0	0	0	0	0	0	0	0.3	0	0	0	0	0	0	2.2	0	0	0	0	0	0	0	0	0	0	0	0	0	0	0	0
IMG_0928	0.2	2.12	0	0	0	0	0	0	0	0.1	0	0	0	0	0	0	0	0	0	0	0	0	0	0	0	0.17	0	0	0	0	0	0	3.5	0	0	0	0	0	0	0	0	0	0	0	0	0	0	0	0
IMG_2080	0	0	0	0	0	0	0	0	0	0	0	2.24	0	0	0	0	0	0	0	0	0	0	0	0	0	50	0	0	0	0	0	0	0.64	0	0	0	0	0	0	0	0	0	0	0	0	0	0	0	0
IMG_2081	0	0	0	0	0	0	0	0	0	0	0	0.13	0	0	0	0	0	0	0	0	0	0	0	0	0	12	0	0	0	0	0	0	0.58	0	0	0	0	0	0	0	0	0	0	0	0	0	0	0	0
IMG_2085	0	0	0	0	0	0	0	0	0	0	0	0.54	0	0	0	0	0	0	0	0	0	0	0	0	0	46	0	0	0	0	0	0	1	0	0	0	0	0	0	0	0	0	0	0	0	0	0	0	0
IMG_2087	0	0	0	0	0	0	0	0	0	0	0	0	0	0	0	0	0	0	0	0	0	0	0	0	0	55.55	0	0	0	0	0	0	13	0	0	0	0	0	0	0	0	0	0	0	0	0	0	0	0
IMG_2090	0	0	0	0	0	0	0	0	0	0	0	0.08	0	0	0	0	0	0	0	0	0	0	0	0	0	52	0	0	0	0	0	0	4.4	0	0	0	0	0	0	0	0	0	0	0	0	0	0	0	0
IMG_2091	0	0	0	0	0	0	0	0	0	0	0	0.46	0	0	0	0	0	0	0	0	0	0.6	0	0	0	26	0	0	0	0	0	0	7.03	0	0	0	0	0	0	0	0	0	0	0	0	0	0	0	0
IMG_2093	0	0	0	0	0	0	0	0	0	0	0	0.63	0	0	0	0	0	0	0	0	0	0	0	0	0	52.13	0	0	0	0	0	0	16.64	0	0	0	0	0	0	0	0	0	0	0	0	0	0	0	0
IMG_2095	0	0	0	0	0	0	0	0	0	0	0	0.17	0	0	0	0	0	0	0	0	0	0	0	0	2.15	62	0	0	0	0	0	0	3.35	0	0	0	0	0	0	0	0	0	0	0	0	0	0	0	0
IMG_2102	0	0	0	0	0	0	0	0	0	0	0	1.24	0	0	0	0	0	0	0	0	0	0	0	0	0	22	0	0	0	0	0	0	14.08	0	0	0	0	0	0	0	0	0	0	0	0	0	0	0	0
IMG_2103	0	0	0	0	0	0	0	0	0	0	0	1.7	0	0	0	0	0	0	0	0	0	0.9	0	0	0	2	0	0	0	0	0	0	2.14	0	0	0	0	0	0	0	0	0	0	0	0	0	0.5	0	0
IMG_2197	0	0	0	0	0	0	0	0	0	0	0	0.95	0	0	0	0	0	0	0	0	0	0	0	0	0	35	0	0	0	0	0	0	10.5	0	0	0	0	0	0	0	0	0	0	0	0	0.08	2.5	0	0
IMG_2198	0	0	0	0	0	0	0	0	0	0	0	3.57	0	0	0	0	0	0	0	0	0	0	0	0	0	1	0	0	0	0	0	0	54.78	0	0	0	0	0	0	0	0	0	0	0	0	0	0	0	0
IMG_2203	0	0	0	0	0	0	0	0	0	0	0	0.91	0	0	0	0	0	0	0	0	5.77	0	0	0	0	57	0	0	0	0	0	0	11.9	0	0	0	0	0	0	0	0	0	0	0	0	0.14	0	0	0
IMG_2207	0	0	0	0	0	0	0	0	0	0	0	0.46	0	0	0	0	0	0	0	0	0	0	0	0	0	35	0	0	0	0	0	0	12	0	0	0	0	0	0	0	0	0	0	0	0	0	0	0	0
IMG_2209	0	0	0	0	0	0	0	0	0	0	0	1.37	0	0	0	0	0	0	0	0	0	0.5	0	0	0	24	0	0	0	0	0	0	46.46	0	0	0	0	0	0	0	0	0	0	0	0	0	0	0	0
IMG_2210	0	0	0	0	0	0	0	0	0	0	0	0.4	0	0	0	0	0	0	0	0	0	0	0	0	0	30	0	0	0	0	0	0	3.43	0	0	0	0	0	0	0	0	0	0	0	0	0.04	0	0	0
IMG_2214	0	0	0	0	0	0	0	0	0	0	0	1.18	0	0	0	0	0	0	0	0	10.5	0	0	0	0	43.92	0	0	0	0	0	0	17.4	0	0	0	0	0	0	0	0	0	0	0	0	0	0	0	0
IMG_2217	0	0	0	0	0	0	0	0	0	0	0	3.1	0	0	0	0	0	0	0	0	0	0	0	0	0	18	0	0	0	0	0	0	25	0	0	0	0	0	0	0	0	0	0	0	0	0	0	0	0
IMG_2200	0	0	0	0	0	0	0	0	0	0	0	1.98	0	0	0	0	0	0	0	0	1.54	0	0	0	0	5	0	0	0	0	0	0	47.5	0	0	0	0	0	0	0	0	0	0	0	0	0	0	0	0
IMG_2205	0	0	0	0	0	0	0	0	0	0	0	2.12	0	0	0	0	0	0	0	0	0	0	0	0	0	52	0	0	0	0	0	0	16.23	0	0	0	0	0	0	0	0	0	0	0	0	0	0.41	0	0
IMG_2919	0	0	0	0	0	0	0	0	0	0	0	21.03	0	0	0	0	0	0	0	6	0	0	0	0	0	4	0	0	0	0	0	0	3.3	0	0	0	0	0	0	0	0	0	0	0	0	0	0	0	0.9
IMG_2921	0	0	0	0	0	0	0	0	0	0	0	17.5	0	0	0	0	0	0	0	0	0	0	0	0	0	4.4	0	0	0	0	0	0	6	0	0	0	0	0	0	0	0	0	0	0	0	0	1.12	0	0
IMG_2923	0	0	0	0	0	0	0	0	0	0	0	0.15	0	0	0	0	0	0	0	0	0	0	0	0	0	43	0	0	0	0	0	0	22	0	0	0	0	0	0	0	0	0	0	0	0	0	0	0	0.41
IMG_2926	0	0	0	0	0	0	0	0	0	0	0	1.26	0	0	0	0	0	0	0	0.2	0	0	0	0	0	1.6	0	0	0	0	0	0	35	0	0	0	0	0	0	0	0	0	0	0	0	0	0	0	0.82
IMG_2930	0	0	0	0	0	0	0	0	0	0	0	5.8	0	0	0	0	0	0	0	0	0	0	0	0	0	0.17	0	0	0	0	0	0	31	0	0	0	0	0	0	0	0	0	0	0	0	0.07	0.13	0	2.1
IMG_2931	0	0	0	0	0	0	0	0	0	0	0	0	0	0	0	0	0	0	0	0	0	0	0	0	0.67	21	0	0	0	0	0	0	27	0	0	0	0	0	0	0	0	0	0	0	0	0	0	0	0
IMG_2934	0	0	0	0	0	0	0	0	0	0	0	0.22	0	0	0	0	0	0	0	0	0	0	0	0	5.35	15	0	0	0	0	0	0	6.5	0	0	0	0	0	0	0	0	0	0	0	0	0.26	0	0	2.3
IMG_2937	0	0	0	0	0	0	0	0	0	0	0	0	0	0	0	0	0	0	0	0	0	0	0	0	0	3.45	0	0	0	0	0	0	17	0	0	0	0	0	0	0	0	0	0	0	0	0.21	0	0	0.8
IMG_2939	0	2	0	0	0	0	0	0	0	0	0	3	0	0	0	0	0	0	0	0	0	0	0	0	0.29	18	0	0	0	0	0	0	11	0	0	0	0	0	0	0	0	0	0	0	0	0.22	0	0	0
IMG_2927	0	0	0	0	0	0	0	0	0	0	0	5.5	0	0	0	0	0	0	0	0	0	0	0	0	0	2.18	0	0	0	0	0	0	26	0	0	0	0	0	0	0	0	0	0	0	0	0	0	0	0
IMG_2978	0	0	0	0	0	0	0	0	0	0	0	0.5	0	0	0	0	0	0	0.1	0	0	0	0	0	0	43	0	0	0	0	0	0	12	0	0	0	0	0	0	0	0	0	0	0	0	0	0	0	0
IMG_2981	0	0	0.28	0	0	0	0	0	0	0	0	3.5	0	0	0	0	0	0	1.51	0	0	0	0	0	0	34	0	0	0	0	0	0	4	0	0	0	0	0	0	0	0	0	0	0	0	0	0	0	0
IMG_2983	0	0	0	0	0	0	0	0	0	0	0	0.74	0	0	0	0	0	0	0	0	0	0	0	0	0	35.11	0	0	0	0	0	0	10.2	0	0	0	0	0	0	0	0	0	0	0	0	0	0	0	0
IMG_2999	0	0	0	0	0	0	0	0	0	0	0	4.74	0	0	0	0	0	0	0	0	0	0	0	0	0	0	0	0	0	0	0	0	12	0	0	0	0	0	0	0	0	0	0	0	0	0.17	0	0	1.16
IMG_2986	0	0	0	0	0	0	0	0	0	0	0	12	0	0	0	0	0	0	0	0	3.8	0	0	0	0.54	33	0	0	0	0	0	0	2	0	0	0	0	0	0	0	0	0	0	0	0	0	0	0	0
IMG_2991	0	0	0	0	0	0	0	0	0	0	0	5	0	0	0	0	0	0	0	0	0	0	0	0	0	31	0	0	0	0	0	0	5.4	0	0	0	0	0	0	0	0	0	0	0	0	0	0	0	0
IMG_2992	0	0	0	0	0	0	0	0	0	0	0	0	0	0	0	0	0	0	0	0	0	0	0	0	0	3.6	0	0	0	0	0	0	8.18	0	0	0	0	0	0	0	0	0	0	0	0	0.21	0	0	0
IMG_2995	0	0	0	0	0	0	0	0	0	0	0	0	0	0	0	0	0	0	0	0	0	0	0	0	0	35	0	0	0	0	0	0	15	0	0	0	0	0	0	0	0	0	0	0	0	0	0	0	0
IMG_2997	0	0	0	0	0	0	0	0	0	0	0	0	0	0	0	0	0	0	0	0	0	0	0	0.8	0	9.15	0	0	0	0	0	0	11	0	0	0	0	0	0	0	0	0	0	0	0	0.56	0	0	0.7
IMG_3000	0	0	0	0	0	0	0	0	0	0	0	0.7	0	0	0	0	0	0	0	0	20	0	0	0	0	1.5	0	0	0	0	0	0	4.2	0	0	0	0	0	0	0	0	0	0	0	0	0	0	0	0
IMG_3128	0	0.45	0	0	0	0	0	0	0	0	0	0.3	0	0	0	0	0	0	0	0	0	0	0	0	0.4	5	0	0	0	0	0	0	20.4	0	0	0	0	0	0	0	0	0	0	0	0	0	0	0	4.06
IMG_3129	0	3	0	0	0	0	0	0	0	0	0	24	0	0	0	0	0	0	0	0	0	0	0	0	0	6.21	0	0	0	0	0	0	5.71	0	0	0	0	0	0.23	0	0	0	0	0	0	0	0	0	0
IMG_3131	0	0.3	0	0	0	0	0	0	0	0	0	30	0	0	0	0	0	0	0	0	0	0	0	0	0	6.5	0	0	0	0	0	0	5.5	0	0	0	0	0	0	0	0	0	0	0	0	0	0	0	0
IMG_3133	0	0	0	0	0	0.2	0	0	0	0	0	11.5	0	0	0	0	0	0	0	0	0	0	0	0	2	17.11	0	0	0	0	0	0	5.5	0	0	0	0	0	0	0	0	0	0	0	0	0	0	0	0
IMG_3135	0	1.06	0	0	0	0	0	0	0	0	0	0	0	0	0	0	0	0	0	0	0	0	0	0	2.5	5.54	0	0	0.3	0	0	0	8.16	0	0	0	0	0	0	0	0	0	0	0	0	0	0	0	0.55
IMG_3137	0	1.4	0	0	0	0	0	0	0	0	0	1.51	0	0	0	0	0	0	0	1.5	0	0	0	0	18	7.13	0	0	0	0	0	0	5.4	0	0	0	0	0	0	0	0	0	0	0	0	0	0	0	0.7
IMG_3139	0	1	0	0	0	0	0	0	0	0	0	1.3	0	0	0	0	0	0	0	21	0	0	0	0	1.24	14.21	0	0	0	0	0	0	3.15	0	0	0	0	0	0	0	0	0	0	0	0	0.08	0	0	4.3
IMG_3142	0	1.4	0	0	0	0	0	0	0	0	0	0.2	0	0	0	0	0	0	0	0	0	0	0	0	8.5	4.02	0	0	0	0	0	0	8.6	0	0	0	0	0	0	0	0	0	0	0	0	0	0	0	3.43
IMG_3143	0	0	0	0	0	0	0	0	0	0	0	2.6	0	0	0	0	0	0	0	0	0	0	0	1	21.2	6.71	0	0	0	0	0	0	0.5	0	0	0	0	0	0	0	0	0	0	0	2	0	0	0	0.8
IMG_3147	0	0	0	0	0	0	0	0	0	0	0	11	0	0	0	0	0	0	0	0	0	0	0	0	9.2	6.11	0	0	0	0	0	0	11.5	0	0	0	0	0	0	0	0	0	0	0	0	0	0	0	0
IMG_3211	0	0	0	0	0	0	0	0	0	0	0	0	0	0	0	0	0	0	0	0	0	0	0	0	0	2	0	0	0	0	0	0	6.7	0	0	0	0	0	0	0	0	0	0	0	0	0.23	0	0	0
IMG_3213	0.21	0	0	0	0	0	0	0	0	0	0	0	0	0	0	0	0	0	0	0	0	0	0	0	0.74	11.1	0	0	0.35	0	0	0	31.23	0	0	0	0	0	0	0	0	0	0	0	0	0	0	0	0
IMG_3195	0	1	0	0	0	0.4	0	0	0	0	0	0	0	0	0	0	0	0	0	0	0	0	0	0	0	0.4	0	0	0	0	0	0	18	0.5	0	0	0	0.3	0	0	0	0	0	0	0	0.09	0	0	0
IMG_3197	0	0	0	0	0	0	0	0	0	0	0	0	0	0	0	0	0	0	0	0	0	0	0	0.6	0	0	0	0	0	0	0	0	13	0	0	0	0	0	0	0	0	0	0	0	0	0.25	0	0	0
IMG_3200	0	0	0	0	0	0	0	0	0	0	0	0	0	0	0	0	0	0	0	6.4	0	0	0	0	0	0	0	0	0	0	0	0	14	0.33	0	0	0	0	0	0	0	0	0	0	0	0.43	0	0	0
IMG_3201	0	0	0	0	0	0.26	0	0	0	0	0	0	0	0	0	0	0	0	0	0	0	0	0	0	2.02	0	0	0	0	0	0	0	2	0	0	0	0	0	0.4	0	0	0	0	0	0	0.21	0	0	21
IMG_3203	0	0	0	0	0	0	0	0	0	0	0	0.44	0	0	0	0	0	1.3	0	0	0	0	0	0	1.1	12	0	0	0	0	0	0	9.01	0	0	0	0	0	0	0	1.73	0	0	0	0	0	0	0	0
IMG_3206	0	0	0	0	0	0	0	0	0	0	0	0	0	0	0	0	0	0	0	0	0	0	0	0	2.72	1.53	0	0	0	0	0	0	6	0	0	0	0	0	0	0	0	0	0	0	0	0	0	0	29
IMG_3208	0	0	0	0	0	0	0	0	0	0	0	0	0	0	0	0	0	0	0	85.32	0	0	0	0	0	0	0	0	0	0	0	0	0	0.23	0	0	0	0	0	0	0	0	0	0	0	0.28	0	0	0
IMG_3192	0	0	0	0	0	0	0	0	0	0	0	10	0	0	0	0	0	0	0	0	0	0	0	0	0	0.4	0	0	0	0	0	0	4	0	0	0	0	0	0	0	0	0	0	0	0	0	0	0	11.53
IMG_4215	0	0	0	0	0	0	0	0	0	0	0	0	0	0	0	0	0	0	0	1.6	0	0	0	0	0	0	0.3	0	0	0	0	0	10.6	1.6	0	0	0	0	0	0	0	0	0	0	0	0	0	0	0
IMG_4222	0	0	0	0	0	0	0	0	0	0	0	0	0	0	0	0	0	0	0	1.1	0	0	0	0	0	1.6	0	0	0	0	0	0	41.1	0	0	0	0	0	0	0	0	0	0	0	0	0	0	0	0
IMG_4224	0	0	0	0	0	0	0	0	0	0	0	0	0	0	0	0	0	0	0	0	0	0	0	0	0	7.6	0	0	0	0	0	0	31.1	0	0	0	0	0	0	0	0	0	0	0	0	0	0	0	0
IMG_4226	0	0	0	0	0	0	0	0	0	0	0	0	0	0	0	0	0	0.5	0	0	0	0	0	0	0	7	0	0	0	0	0	0	28	0	0	0	0	0	0	0	0	0	0	0	0	0	0	0	0
IMG_4227	0	0	0	0	0	0	0	0	0	0	0	0	0	0	0	0	0	0	0	0	0	0	0	0	0	1	0	0	0	0	0	0	34	0	0	0	0	0	0	0	0	0	0	0	0	0	0	0	0
IMG_4232	0	0	0	0	0	0	0	0	0.5	0	0	0	0	0	0	0	0	0	0	0	0	0	0	0	0	2.5	0	0	0	0	0	0	35	2	0	0	0	0	0	0	1	0	0	0	0	0	0	0	0
IMG_4234	0	0	0	0	0	0	0	0	0	0	0	0	0	0	0	0	0	0	0	0	0	0	0	0	0	1	0	0	0	0	0	0	36	0	0	0	0	0	0	0	0	0	0	0	0	0.2	0	0	0
IMG_4236	0	5	0	0	0	0	0	0	0	0	0	0	0	0	0	0	0	0	0	0	0	0	0	0	0	6.5	0	0	0	0	0	0	49	3	0	0	0	0	0	0	0	0	0	0	0	0.1	0	0	0
IMG_4237	0	0	0	0	0	0	0	0	0.05	0	0	0	0	0	0	0	0	0	0	3	0	0	0	0	0	2.5	0	0	0	0	0	0	48	0	0	0	0	0	0	0	0	0	0	0	0	0	0	0	0
IMG_4240	0	0	0	0	0	0	0	0	0	0	0	0	0	0	0	0	0	0	0	0	0	0	0	0	0	4	0	0	0	0	0	0	26	2	0	0	0	0	0	0	0	0	0	0	0	0	0	0	0
IMG_3769	0	0	0	0	0	0	0	0	0	0	0	0	0	0	0	0	0	0	0	0	0	0	0	0	0	0	0	0	0	0	0	0	27.6	0	0	0	0	0	0	0	0	0	0	0	0	0	0	0	0
IMG_3771	0	0	0	0	0	0.6	0	0	0	0	0	0	0	0	0	0	0	0	0	0	0	0	0	0	0	0	0	0	0	0	0	0	66.1	0	0	0	0	0	0	0	0	0	0	0	0	0	0	0	0
IMG_3772	0	0	0	0	0	0	0	0	0	0	0	0	0	0	1	0	0	0	0	0	0	0	0	0	0	0	0	0	0	0	0	0	34	1	0	0	0	0	0	0	0	0	0	0	0	0	0	0	0
IMG_3776	0	0	0	0	0	0	0	0	0	0	0	0	0	0	0	0	0	0	0.5	1.5	0	0	0	0	0	0	0	0	0	0	0	0	75	0	0	0	0	0	0	0	0	0	0	0	0	0	0	0	0
IMG_3778	0	0	0	0	0	0	0	0	0	0	0	0	0	0	1.2	0	0	0	0	0	0	0	0	0	0	2	0	0	0	0	0	0	39	0.5	0	0	0	0	0	0	0	0	0	0	0	0	0	0	0
IMG_3781	0	0	0	0	0	1	0	0	0.5	0	0	0	0	0	2	0	0	0	0	0	0	0	0	0	0	2	0	0	1	0	0	0	22	0	0	0	0	1.5	0	0	0	0	0	0	0	0	0	0	0
IMG_3783	1.1	0	0	0	0	0	0	0	0	0	0	0	0	0	0	0	0	0.6	0	2.1	0	0	0	0	0	6	0	0	0	0	0	0	29.5	0	0	0	0	0	0	0	0	0	0	0	0	0.6	0	0	0
IMG_3785	0	0	0	0	0	0.5	0	0	0	0	0	0	0	0	0	0.5	0	0	0	0	0	0	0	0	0	2.5	0	0	0	0	0	0	24.5	1.5	0	0	0	0	0	0	0	0	0	0	0	0.03	0	0	0
IMG_3788	0	0	0	0	0	0.6	0	0	0	0	0	0	0	0	0	0	0	0	0	0	0	0	0	0	0	5.1	0	0	0	0	0	0	23.5	3.1	0	0	0	0	0	0	0	0	0	0	0	0	0	0	0
IMG_3790	0	0	0	0	0	0	0	0	0	0	0	0	0	0	0	0	0	0	0	30	0	0	0	0	0	1.6	0	0	0	0	0	0	11.6	3	0	0	0	0	0	0	0	0	0	0	0	1	0	0	0
IMG_0779	0	0	0	0	0	0	0.18	0	0	0	0	0	0	0	3.1	0.13	0	0	0	0	0	0	0	0.78	0	0	0	0	0.97	0	0	0	0.63	4.45	0	0	0	0	1.04	0	0	0	0	1	0	4	0	0	0
IMG_0780	0	0	0	0	0	0	0	1.11	0	0	0	0	0	0	0	0	0.51	0	0	0	0	0	0	0	0	0	0	0	0	0	0.13	0	1.65	3.15	0	0	0	0	0	0	0	0	0	0	0	11.08	0	0	0
IMG_0782	0	0	0	0	0	0	0	0.88	0	0	0	0	0	0	0	0	0.99	0	0	0	0	0	0	0	0	0	0	0	0	0	0	0	7.94	1.61	0	0	0	0	1.47	0	0	0	0	0	0	1.79	0	0	0
IMG_0785	0	0	0	0	2.43	0	0	0	0	0	0	0	0	0	0	0	0	0	0	0	0	0	0	0	0	0	0	0	0	0	0	0	0	1.03	0	0	0	0	0	0	0	0	0	0	0	2.24	0	0	0
IMG_0786	0	0	0	0	0	0	0.86	0	0	0	0	0	0	0	0	0	0	0	0	0	0	0	0	0	0	0	0	0	0	0	0	0	11.46	9.93	0	0	0.87	0	0	0	0	0	0	0	0	0.82	0	0	0
IMG_0788	0	0	0	0	0	0.94	0	0	0	0	0	0	0	0	0	0	1.98	0	0	0	0	0	0	0	0	0	0	0	0	0	0	0	0	13	11.4	0	0	0	0	0	0	0	0	0	0	0	0	0	0
IMG_0041	0	0	0	0	0	0	0	0	0	0	0	0	0	0	0	0	0.17	0	0	0	0	0	0	0	0	0	0	0	0	0	0	0	2.24	5.01	0	0	0	0	0	0	0	0	0	0	0	0	0	0	0
IMG_0792	0	0	0	0	0	0	0	0	0	0	0	0	0	0	0	0	0.48	0	0	0	0	0	0	0	0	0	0	0	0	0	0	0	6	0	0	0	0	0	0	0	0	0	0	0	0	7.4	0	0	0
IMG_0795	0	0	0	0	2.46	0	0	0	0	0	0	0	0	0	0	0	0.65	0	0	0	0	0	0	0	0	0	0	0	0	0	0	0	1.66	0.49	0	0	0	0	0	0	0	0	0	0	0	10.82	0	0	0
IMG_0796	0	0	0	0	0	1.47	0	0	0	0	0	0	0	0	0	0	0	0	0	2.94	0	0	0	0	0	0	0	0	0	0	0	0	5.41	0	0	0	0	0	0	0	0	0	0	0	0	0.28	0	0	0
IMG_0827	0	0	0	0	0	0.3	0	0	0	0.21	0	0	0	0	0	0	0	0	0	1.68	0	0	0	0	0	1.3	0	0	0	0	0	0	11	0.86	0	0	0.17	0	0	0	0	0	0	0	0	0	0	0	0
IMG_0828	0	0	0	0	0	0	0	0	0	0.19	0	0	0	0	0	0	0	0	0	0	0	0	0	0	0	0	0	0	0	0	0	0	16	0	0	0	0	0	0	0	0	0	0	0	0	0.37	0.9	0	0.16
IMG_0829	0	0	0	0	0	0	0	0	0	0	0.5	0	0	0	0	0	0	0	0	1	0	0	0	0	0	0	0	0	0	0	0	0.96	13	0.58	0	0	0	0	0	0	0	0	0	0	0	0	0	0	0
IMG_0833	0	0	0	0	0	0	0	0	0	0	0	0	0	0	0	0	0	0	0	0	0	0	0	0	0	0	0	0	0	0	0	0	8.5	0	0	0	0	0	0	0	0	0	0	0	0	0	4.5	0	0
IMG_0835	0	0	0	0	0	0	0	0	0	0	0	0	0	0	0	0	0	0	0	0	0	0	0	0	0	0	0	0	0	0	0	0	10	0.62	0	0	0	0	0	0	0	0	0	0	0	8.06	0	0	0.13
IMG_0836	0	0	0	0	0	0	0	0	0	0	0.13	0	0	0	0	0	0	0	0	0	0	0	0	0	0	0	0	0	0	0	0	1.32	16	0	0	0	0	0	0	0	1.07	0	0	0	0	0.27	0	0	0
IMG_0837	0	0	0	0	0	0	0	0	0	0	0	0	0	0	0	0	0	0	0	0	0	0	0	0	0	0	0	0	0	0	0	0	10.54	0	0	0	0	0	0	0	0	0	0	0	0	1.03	0.5	0	0
IMG_0841	0	0	0	0	0	0	0	0	0	0	0	0	0	0	0	0	0	0	0	0	0	0	0	0	0	0.83	0	0	0	0	0	0	17	0	0	0	0	0	0	0	0	0	0	0	0	0.23	0	0	0
IMG_0842	0	0	0	0	0	0	0	0	0	0.2	0	0	0	0	0	0	0	0	0	0	0	0	0	0	0	0	0	0	0	0	0	0	9.42	0	0	0	0	0.26	0	0	0	0	0	0	0	0.13	0	0	0
IMG_0839	0	0	0	0	0	0	0	0	0	0	0	0	0	0	0	0	0	0	0	0	0	0	0	0	0	1.37	0	0	0	0	0	0	2.5	0	0	0	0	0	0	0	0	0	0	0	0	0	0	0	0
IMG_0892	0	0	0	0	0	0	0	0	0	0.19	0	0	0	0	0	0	0	0	0	0	0	0	0	0	0	0	0.1	0	3.3	0	0	0	22	5.3	0	0	0.23	0	0.38	1.47	1	0	0	0	0	0	0	0	0
IMG_0890	0	0	0	0	0	0	0	0	0	0.41	0	0	0	0	0	0.23	0	0	0	1.33	0	0	0	0	0	0	0.75	0	0	0	0	0	3	1.22	0	0	0.35	0	0.22	2.4	0	0	0	0	0	0	0	0	0.3
IMG_0886	0	0	0	0	0	0.54	0	0	0	0	0.04	0	0	0	0	0	0	0	0	0	0	0	0	0	0	0	0	0	0	0	0	0	2	5.43	0	0	0	0	0	0	2	0	0	0	0	0	0	0	0
IMG_0883	0	0	0	0	0	0	0	0	0	0.76	0	0	0	0	0	0	0	0	0	0	0	0	0	0	0	0	0	0	5.5	0	0	0	4	3.7	0	0	0	0	5	0	3.1	0	0	0	0	0	0	0	0
IMG_0881	0	0	0	0	0	0.15	0	0	0	0.95	0	0	0	0	0	0	0	0	0	0	0	0	0	0	0	0	0.42	0	0	0	0	0	4	2.4	0	0	0	0	0	0	0	0	0	0	0	0	0	0	0
IMG_0879	0	0	0	0	1.2	0	0.4	0	0	1.52	0.12	0	0	0	0	0	0	0	0	0	0	0	0	0	0	0	0	0	0	0	0	0	2	7.5	1.5	1.4	0	0	1	0	1	0	0	0	0	0	0	0	0
IMG_0871	0	0	0	0	1.63	0.2	0	0	0	1.25	0.08	0	0	0	0	0	0	0	0	0	0	0	0	0	0	0	0	0	0	0	0	0	0.4	12	0	0	0	0	4.02	0	0	0	0	0	0	0	0	0	0
IMG_0869	0	0	0	0	0	0	0	0	0	0	0	0	0	0	0	0	0	0	0	0	0	0	0	0	0	0	0	0	0	0	0	0	3.43	7.71	0	0	0	0	0	0	0	0	0	0	0	0	0	0	0
IMG_0888	0	0	0	0	0	0	0	0	0	0	0	0	0	0	0	0	0	0	0	0	0	0	0	0	0	0	0	0	0	0	0	0	1.33	2.38	0	0	0	0	0.65	0	0	0	0	0	0	0	0	0	0
IMG_0872	0	0	0	0	0	0	0	0	0	0	0.23	0	0	0	0	0	0	0	0	0	0	0	0	0	0	0	0	0	0.5	0	0	0	0	22	0	0	0	0	4	2	0	0	0	0	0	0	0	0	0
IMG_0938	0	0	0	0	0	0	0	0	0	0.35	0	0	0	0	0	0	0	0	0	0	0	0	0	0	0	0	0	0	0	0	0	0	3.7	4.33	0	0	0	0	0	0	0	0	0	0	0	0	0	0	0.5
IMG_0940	0	0	0	0	0	0	0	0	0	0	0	0	0	0	0	0	0	0	0	0	0	0	0	0	0	0	0.23	0	0	0	0	0	2.17	7.16	0	0	0	0	0	0	0	0	0	0	0	0	0	0	0.52
IMG_0946	0	0	0	0	0	0	0	0	0	0	0	0	0	0	0	0	0	0	0	0	0	0	0	0	0	0	0	0	0	0	0	0	0	2	0	0	0	0	0	0	0	0	0	0	0	0	0	0	0
IMG_0949	0	0	0	0	0	0	0	0	0	0	0	0	0	0	0	0	0	0	0	0	0	0	0	0	0	0	0	0	0	0	0	0	1	0.23	0	0	0	0	0	0	0	0	0	0	0	0	0	0	0
IMG_0957	0	0	0	0	0	2	0	0	0	0.57	0	0	0	0	0.25	0	0	0	0	0	0	0	3.33	0	0	0	0	0	0	0	0	0	3.45	28	0	0	0	0	3.5	2	0	0	0	0	0	0	0	0	0
IMG_0947	0	0	0	0	0	0	0	0	0	0	0	0	0	0	0	0	0	0	0	0	0	0	0	0	0	0	0	0	0	0	0	0	10.42	4.13	0	0	0	0	0	0	0	0	0	0	0	0	0	0	0
IMG_0951	0	0	0	0	0	0	0	0	0	0.09	0	0	0	0	0	0	0	0	0	0	0	0	0	0	0	0	0.05	0	0	0	0	0	10	7.46	0	0	0	0	0	0	0	0	0	0	0	0	0	0	0
IMG_0952	0	0	0	0	0	0	0	0	0	0.3	0	0	0	0	0	0	0	0	0	0	0	0	0	0	0	0	0	0	0	0	0	0	6	11	0	0	0	0	0	0	0	0	0	0	0	0	0	0	0
IMG_0935	0	0	0	0	0	0	0	0	0	0.51	0	0	0	0	0	0	0	0	0	5.1	0	0	0	0	0	0	0	0	0	0	0	0.21	3.5	3	0	0	0	0	0	0	0	0	0	0	0	0	0	0	0
IMG_0941	0	0	0	0.8	0	0.68	0	0	0	1	0	0	0	0	0	0	0	0.6	0	5	0	0	0	0	0	0	0	0	0	0	0	0	6	1.2	1	0	0	0	0.5	0	1.5	0	0	0	0	0	0	0	2
IMG_2107	0	0	0	0	0	0	0	0	0	0	0	0	0	0	0	0	0	0	0	0	0	0	0	0	0	0	0	0	0	0	0	0	5.07	1.22	0	0	0	0	0	0	0	0	0	0	0	0.02	0	0	0
IMG_2110	0	0	0	0	0	0	0	0	0	0	0	0	0	0	0	0	0	0	0	0	0	0	0	0	0	0	0	0	0	0	0	0	20	0.12	0	0	0	0	0.12	0	0	0	0	0	0	0	0	0	0
IMG_2112	0	0	0	0	0	0	0	0	0	0	0	0	0	0	0	0	0	0	0	0	0	0	0	0	0	5.35	0	0	0	0	0	0	4.1	0.18	0	0	0	0	0	0	0	0	0	0	0	0.05	0	0	0
IMG_2115	0	0	0	0	0	0	0	0	0	0	0	0	0	0	0	0	0	0	0	0	0	0	0	0	0	12	0	0	0	0	0	0	4.26	0	0	0	0	0	0	0	0	0	0	0	0	0	0	0	0
IMG_2116	0	0	0	0	0	0	0	0	0	0	0	0	0	0	0	0	0	0	0	40.25	0	0	0	0	0	1.74	0	0	0	0	0	0	4	0.37	0	0	0	0	0	0	0	0	0	0	0	0	0	0	0
IMG_2121	0	0	0	0	0	0	0	0	0	0	0	0	0	0	0	0	0	0	0	0	0	0	0	0	0	3	0	0	0	0	0	0	5.6	0	0	0	0	0	0	0	0	0	0	0	0	0.11	0	0	0
IMG_2123	0	0	0	0	0	0	0	0	0	0	0	0	0	0	0	0	0	0	0	0	0	0	0	0	0	5	0	0	0	0	0	0	10.34	0.4	0	0	0	0	0	0	0	0	0	0	0	0	0	0	0.55
IMG_2125	0	0	0	0	0	0	0	0	0	0	0	0	0	0	0	0	0.6	0	0	0	0	0	0	0	0	3	0	0	0.52	0	0	0	1.7	0.3	0	0	0	0	0	0	0	0	0	0	0	0.57	0	0	0
IMG_2127	0	0	0	0	0	0	0	0	0	0	0	0	0	0	0	0	0	0	0	0	0	0	0	0	0	25	0	0	0	0	0	0	2.5	0.13	0	0	0	0	0	0	0	0	0	0	0	0.25	0	0	0
IMG_2132	0	0	0	0	0	0	0	0	0	0	0	0	0	0	0	0	0	0	0	0.2	0	0	0	0	0	2	0	0	0	0	0	0	10.8	0	0	0	0	0	0	0	0	0	0	0	0	0.98	0	0	0
IMG_2246	0	0	0	0	0	0	0	0	0	0	0	0	0	0	0	0	0	0	0	83.95	0	0	0	0	0	0	0	0	0	0	0	0	2.33	0	0	0	0	0	0	0	0	0	0	0	0	0	0	0	0
IMG_2247	0	0	0	0	0	0	0	0	0	0	0	0	0	0	0	0	0	0	0	0	0	0	0	0	0	37	0	0	0	0	0	0	20.16	0	0	0	0	0	0	0	0	0	0	0	0	0	0	0	0
IMG_2248	0.6	0	0	0	0	0	0	0	0	0	0	0	0	0	0	0	0	0	0	0	0	0	0	0	0	8	0	0	0	0	0	0	25	0	0	0	0	0	0	0	0	0	0	0	0	0	4	0	0
IMG_2249	0	0	0	0	0	0	0	0	0	0	0	0.51	0	0	0	0	0	0	0	0	0	0	0	0	0.71	5	0	0	0	0	0	0	27	0	0	0	0	0	0	0	0	0	0	0	0	2.17	0.55	0	0
IMG_2245	0	0	0	0	0	0	0	0	0	0	0	0	0	0	0	0	0	0	0	0	0	0	0	0	0	0.3	0	0	0	0	0	0	19.7	0	0	0	0	0	0	0	0	0	0	0	0	0.65	0	0	0
IMG_2241	0	0	0	0	0	0	0	0	0	0	0	0.4	0	0	0	0	0	0	0	0	0	0	0	0	0	7	0	0	0	0	0	0	34.41	0	0	0	0	0	0	0	0	0	0	0	0	0	0	0	0
IMG_2239	0	0.22	0	0	0	0	0	0	0	0	0	0	0	0	0	0	0	0	0	0	0	0	0	0	0	10.38	0	0	0	0	0	0	42.3	0	0	0	0	0	0	0	0	0	0	0	0	0	0	0	0
IMG_2234	0	0	0	0	0	0	0	0	0	0	0	0	0	0	0	0	0	0	0	0	0	0	0	0	0	60	0	0	0	0	0	0	0	0	0	0	0	0	0	0	0	0	0	0	0	0.22	0	0	0
IMG_2228	0	0	0	0	0	0	0	0	0	0	0	0.12	0	0	0	0	0	0	0	0	0	0	0	0	0	2.5	0	0	0	0	0	0	44.05	0	0	0	0	0	0	0	0	0	0	0	0	1.62	0	0	0
IMG_2226	0	0	0	0	0	0	0	0	0	0	0	0	0	0	0	0	0	0	0	0	4.72	0	0	0	0	30	0	0	0	0	0	0	22.42	0	0	0	0	0	0	0	0	0	0	0	0	0	0.74	0	7.9
IMG_2945	0	0	0	0	0	0	0	0	0	0	0	0	2.6	0	0	0	0	0	0	0	0	0	0	0	0	1.5	0	0	1.1	0	0	0	14.5	0	0	0	0	0	0	0	0	0	0	0	0	0	0	0	2.6
IMG_2947	0	0	0	0	0	0	0	0	0	0	0	0	0	0	0	0	0	0	0	3	0	0	0	0	0	9	0	0	0	0	0	0	7	0	0	0	0	0	0.6	0	0	0	0	0	0	0.8	0	0	4.3
IMG_2948	0	0	0	0	0	0	0	0	0	0	0	0	0	0	2.6	0	0	0	0	0	0	0	0	0	0	0	0	0	0	0	0	0	4	0	0	0	0	0	0	0	0	0	0	0	0	0.2	0	0	4.5
IMG_2952	0	0	0	0	0	0.21	0	0	0	0	0	0	0	0	0	0	0	0	0	0	0	0	0	0	0	12	0	0	0	0	0	0	10	0	0	0	0	0	0	0	0	0	0	0	0	0.3	0	0	7
IMG_2953	0	0	0	0	0	0	0	0	0	0	0	0	0	0	0	0	0	0	0	0	0	0	0	0	0	1	0	0	0	0	0	0	19	0	0	0	0	0	0	0	0	0	0	0	0	0	0	0	2
IMG_2956	0	0	0	0	0	0	0	0	0	0	0	0	0	0	0	0	0	0	0	0	0	0	0	0	0	0	0	0	0	0	0	0	16.5	0	0	0	0	0	0	0	0	0	0	0	0	0	0	0	15.5
IMG_2957	0	0	0	0	0	0	0	0	0	0	0	0	0	0	0	0	0	0	0	31	0	0	0	0	0	0	0	0	0.66	0	0	0	4	0	0	0	0	0	0	0	0	0	0	0	0	0	0	0	7.4
IMG_2960	0	0	0	0	0	0	0	0	0	0	0	0	0	0	0	0	0	0	0	0	0	0	0	0	0	0	0	0	0.22	0	0	0	10.3	0.22	0	0	0	0	0	0	0	0	0	0	0	0	0	0	18
IMG_2963	0	0	0	0	0	0	0	0	0	0	0	0	0	0	0	0	0	0	0	0.3	0	0	0	0	0	0	0	0	0	0	0	0	11	0	0	0	0	0	0	0	0	0	0	0	0	0.3	0	0	10
IMG_2966	0	0	0	0	0	0	0	0	0	0	0	0	0	0	0	0	0	0	0	2.7	0	0	0	0	0	0	0	0	0	0	0	0	14.5	1.7	0	0	0	0	0	0	0	0	0	0	0	0.4	0	0	14
IMG_3002	0	0	0	0	0	0	0	0	0	0	0	0	0	0	0	0	0	0	0	0	0	0	0	0	0	0.8	0	0	0	0	0	0	14.5	0.5	0	0	0	0	0	0	0	0	0	0	0	0	0	0	0
IMG_3005	0	0	0	0	0	0	0	0	0	0	0	0	0	0	0	0	0	0	0	0	0	0	0	0	0	0	0	0	0	0	0	0	15	0.8	0	0	0	0	0	0	0	0	0	0	0	0.61	0	0	0.45
IMG_3007	0	0	0	0	0	0	0	0	0	0	0	0	0	0	0	0	0	0	0	0	0	0	0	0	0	0.32	0	0	0	0	0	0	23	0	0	0	0	0	0	0	0	0	0	0	0	0	0	0	5.5
IMG_3022	0	0	0	0	0	0	0	0	0	0	0	0	0	0	0	0.22	0	0	0	0.23	0	0	0	0	0	0	0	0	0	0	0	0	24	0.23	0	0	0	0	0	0	0	0	0	0	0	0.04	0	0	0
IMG_3011	0	0	0	0	0	0	0	0	0	0	0	0	0	0	0	0	0	0	0	0	0	0	0	0	0	0	0	0	0	0	0	0	4.7	0.5	0	0	0	0	0	0	0	0	0	0	0	0.06	0	0	0
IMG_3015	0	0	0	0	0	0	0	0	0	0	0	0	0	0	0	0	0	0	0	0	0	0	0	0	0	0	0	0	0	0	0	0	30	0.44	0	0	0	0	0	0	0	0	0	0	0	0	0	1.5	0
IMG_3016	0	0	0	0	0	0	0	0	0	0	0	0	0	0	0	0	0	0	0	27	0	0	0	0	0	0.4	0	0	0	0	0	0	2	0	0	0	0	0	0	0	0	0	0	0	0	0	0	0	4.4
IMG_3018	0	0	0	0	0	0	0	0	0	0	0	0	0	0	0	0	0	0	2.3	2.3	0	0	0	0	0	0	0	0	0	0	0	0	21	0	0	0	0	0	0	0	0	0	0	0	0	0.5	0	0	0
IMG_3025	0	0	0	0	0	0	0	0	0	0	0	0	0	0	0	0	0	0	0	0	0	0	0	0	0	0	0	0	0	0	0	0	14	1	0	0	0	0	0	0	0.3	0	0	0	0	0	0	0	0
IMG_3026	0	0	0.42	0	0	0	0	0	0	0	0	0	0	0	0	0	0	0	0	0	0	0	0	0	0	0	0	0	0	0	0	0	6.6	0	0	0	0	0	0	0	0	0	0	0	0	0.12	0	0	3.7
IMG_3149	0	0	0	0	0	0	0	0	0	0	0	9.7	0	0	0	0	0	0	0	0	0	0	0	0	1.7	3.2	0	0	0	0	0	0	15	0	0	0	0	0	0	0	0	0	0	0	0	0	0	0	0
IMG_3151	0	1.7	0	0	0	0.12	0	0	0	0	0	16	0	0	0	0	0	0	0	0	0	0	0	0	0.7	5	0	0	0	0	0	0	9	0	0	0	0	0	0	0	0	0	0	0	0	0	0	0	0
IMG_3153	0	2	0	0	0	0	0	0	0	0	0	2.8	0	0	0	0	0	0	0	0	0	0	0	0	0.6	34	0	0	0	0	0	0	3	0.18	0	0	0	0	0	0	0	0	0	0	0	0.08	0	0.2	0.9
IMG_3156	0	3.7	0	0	0	0	0	0	0	0	0	1.05	0	0	0.33	0	0	0	0	0	0	0	0	0	0	12	0	0	0	0	0	0	12	0	0	0	0	0	0	0	0	0	0	0	0	0	0	1.3	1
IMG_3158	0	0.55	0	0	0	0	0	0	0	0	0	6.6	0	0	0	0	0	0	0	0	0	0	0	0	10	14	0	0	0	0	0	0	16	0	0	0	0	0	0	0	0	0	0	0	0	0	0	0	0
IMG_3171	0	3	0	0	0	0	0	0	0	0	0	13	0	0	0	0	0	0	0	0	0	0	0	0	2.5	11	0	0	0	0	0	0	3	0	0	0	0	0	0	0	0	0	0	0	0	0	0	0	6.5
IMG_3162	0	0	1.2	0	0	0	0	0	0	0	0	3.5	0	0	0	0	0	0	0	0	0	0	0	0	0.5	0	0	0	0	0	0	0	21	0	0	0	0	0	0	0	0	0	0	0	0	0	0	0	1.7
IMG_3164	0	1.2	0	0	0	0	0	0	0	0	0	0	0	0	0	0	0	0	0	0	0	0	0	0	3	1	0	0	0	0	0	0	17	0.7	0	0	0	0	0	0	0	0	0	0	0	0	0	0	2.7
IMG_3167	0	0.6	0	0	0	0	0	0	0	0	0	29	0	0	0	0	0	0	0	0	0	0	0	0	11	0.8	0	0	0	0	0	0	10	0	0	0	0	0	0	0	0	0	0	0	0	0	0	0	0
IMG_3173	0	4	0	0	0	0	0	0	0	0	0	12	0	0	0	0	0	0	0	0	0	0	0	0	1	4	0	0	0	0	0	0	2	0	0	0	0	0	0	0	0	0	0	0	0	0	0	0	0.12
IMG_3219	0	0	0	0	0	0	0	0	0	0	0.1	0.4	0	0	0	0	0	0	0	2.5	0	0	0	0	0	8	0	0	0	0	0	0	16.5	0	0	0	0	0	0.5	0	0	0	0	0	0	0	0	0	1.2
IMG_3222	0	0	0	0	0	0	0	0	0	0	0.06	0	0	0	0	0	0	0	0	0	0	0	0	0	0	10	0	0	0	0	0	0	11	0	0	0	0	0	0.5	0	0	0	0	0	6	0	0	0	0
IMG_3223	0	0	0	0	0	0.24	0	0	0	0	0	13	0	0	0	0	0	0	0	0	0	0	0	0	0.22	12	0	0	0	0	0	0	7	0	0	0	0	0	0	0	1.5	0	0	0	0	0	0	0	0
IMG_3231	0	0	0	0	0	0	0	0	0	0	0	0.8	0	0	0	0	0	0	0	0	0	0	0	0	0	6.3	0	0	0	0	0	0	49	0	0	0	0	0	0	0	0	3	0	0	1.5	0	0	0	2
IMG_3234	0	0	0	0	0	0	0	0	0	0	0	6.7	0	0	1.3	0	0	0	0	11	0	0	0	0	0.6	2	0	0	0	0	0	0	5	1	0	0	0	0	0	0	0	0	0	0	0	0	0	0	1
IMG_3235	0	0	0	0	0	0	0	0	0	0	0	0	0	0	0	0	0	0	0	5.5	0	0	0.9	0	0.2	8	0	0	0	0	0	0	4	1.5	0	0	0	0	1	0	0	0	0	0	0	0.1	0	0	0
IMG_3237	0	0	0	0	0	0	0	0	0	0	0	0	0	0	0	0	0	0	0	0	0	0	0	0	0	10.5	0	0	0	0	0	0	4	0.24	0	0	0	0	0	0	0	0	0	0	0	0	0	0	12.1
IMG_3239	0	0	0	0	0	0	0	0	0	0	0	0	0	0	0	0	0	0	0	32	0	0	0	0	9	10	0	0	0	0	0	0	3	0	0	0	0	0	0	0	0	0	0	0	0	0	0.4	0	0
IMG_3242	1.8	0	0	0	0	0.2	0	0	0	0	0	0.22	0	0	0	0	0	0	0	0	0	0	0	0	2	32	0	0	0	0	0	0	5	0	0	0	0	0	0	0	0	0	0	0	0	0	0	0	1
IMG_3244	0	0	0	0	0	0	0	0	0	0	0	0	0	0	0	0	0	1	0	0	0	0	0	0	6	17	0	0	0	0	0	0	6	1	0	0	0	0	0	0	0	0	0	0	0	0	0	0	0.25
IMG_4163	0	0	0	0	0	0	0	0	0	0	0	0	0	0	0	0	0	0	0	0	0	0	0	0	0	0	0	0	1	0	0	0	16	1.3	0	0	0	0	0	0	0	0	0	0	0	0	0	0	0
IMG_4166	0	0	0	0	0	0	0	0	0	0	0	0	0	0	0	0	0	0	0	12	0	0	0	0	0	3	0	0	0.7	0	0	0	25	0	0	0	0	0	0.3	0	0	0	0	0	0	0.7	0	0	0
IMG_4168	0	0	0	0	0	0	0	0	0.7	0	0	0	0	0	0	0	0	0.04	0	4	0	0	0	0	0	4	0	0	1	0	0	0	39	0.5	0	0	0	0	0	0	0	0	1	0	0	0	0	0	0
IMG_4169	0	0	0	0	0	0	0	0	0	0	0.06	0	0	0	0	0	0	0	0	0	0	0	0.5	0	0	1	0	0	0.7	0	0	0	72	0	0	0	0	0	0	0	0	0	0	0	0	0	0	0	0
IMG_4172	0	0	0	0	0	0	0	0	0	0	0	0	0	0	0	0	0	0	0	0	0	0	0	0	0	0	0	0	0	0	0	0	71	0	0	0	0	0	0	0	0	0	0	0	0	0	0	0	0
IMG_4174	0	0	0	0	0	0	0	0	0	0	0	0	0	0	0	0	0	0	0	0	0	0	0	0	0	2.2	0	0	3.8	0	0	0	24	0	0	0	0	0	0	0	0	0	0	0	0	0	0	0	0
IMG_4176	0	0	0	0	0	0	0	0	0.2	0	0	0	0	0	0	0	0	0	0	0	0	0	0	0	0	0	0	0	0	0	0	0	76	0	0	0	0	0	0	0	0	0	0	0	0	0	0	0	0
IMG_4177	0	0	0	0	0	0	0	0	0	0	0	0	0	0	0	0	0	0.14	0	2.5	0	0	0	0	0	0	0	0	0	0	0	0	47.5	3.5	0	0	0	0	0	0	0	0	0	0	0	0	0	0	0
IMG_4182	3	0	0	1.5	0	0	0	0	0	0	0	0	0	0	0	0	0	0	0	1	0	0	0	0	0	0	0	1.6	1	0.5	0	0	30	0	0	0	0	0	0	0	0	0	2.5	0	0	0	0	0	0
IMG_4184	0	0	0	0	0	0	0	0	0	0	0	0	0	0	0	0	0	0	0	0	0	0	0	0	0	0	0.3	1.7	0.7	0	0.3	0	45	2.6	0	0	0	0	0	0	0	0	0	0	0	0	0	0	0
IMG_3804	0	0	0	0	0	0	0	0	0	0	0.06	0	0	0	0	0	0	0	0	2	0	0	0	0	0	0	0	0	1	0	0	0	72	0	0	0	0	0	0	0	0	0	0	0	0	0	0.5	0	0
IMG_3806	0	0	0	0	0	0.6	0	0	0	0	0	0	0	0	0	0	0	0	0	0	0	0	0	0	0	0	0.6	0	0.6	0	0	0	43.5	1	0	0	0	0	1	0	0	0	0	0	0	0	0	0	0
IMG_3807	0	0	0	0	0	0	0	0	0	0	0.07	0	0	0	0	0	0	0	0	0	0	0	0	0	0	0	0	0	0	0	0	0	83	0	0	0	0	0	0	0	0	0	0	0	0	0	0	0	0
IMG_3809	0.7	0	0	0	0	0	0	0	0	0	0	0	0	0	0	0	0	0	0	29	0	0	0	0	0	0	0.6	0	1.1	0	0	0	8	3.1	0	0	0	0	0	0	0	0	0	0	0	0	0	0	0
IMG_3811	1	0	0	1	0	0	0	0	0	0	0	0	0	0	0	0.6	0	0	0	0	0	0	0	0	0	0	0	0	0.7	0	0	0	10.5	10.2	0	0	0	0	0	0	5.3	0	0	0	0	0	0	0	0
IMG_3813	0	0	0	0	0	0	0	0	0	0	0	0	0	0	0	0	0	0.5	0	17	0	0	0	0	0	1	0	0	0	0	0	0	17.5	2	0	0	0	0	0	0	0	0	0	0	0	0	0	0	0
IMG_3816	0	0	0	0	0	0	0	0	0	0	0	0	0	0	0	0	0	0	0	2.5	0	0	0	0	0	0	0	0	0	0	0	0	76	0	0	0	0	0	0	0	0	0	0	0	0	0	0	0	0
IMG_3818	0	0	0	0	0	0.1	0	0	0	0	0	0	0	0	0	0	0	0	0	0	0	0	0	0	0	1	0	0	0	0	0	0	46	0	0	0	0	0	0	0	0	0	0	0	0	0	0	0	0
IMG_3821	0	0	0	0	0	0	0	0	0	0	0	0	0	0	0	0	0	0	0	0	0	0	0	0	0	0	0	0	0	0	0	0	44	0	0	0	0	0	0	0	0	0	0	0	0	0	0	0	0
IMG_3823	0	0	0	0	0	0	0	0	0	0	0	0	0	0	0	0	0	0	0	16	0	0	0	0	0	0	0	0	0	0	0	0	27.5	0	0	0	0	0	0	0	0	0	0	0	0	0	0	0	0
[truncated: 31 more columns]

## Sheet: Functional structure_FEs
	FE9	FE19	FE41	FE15	FE6	FE7	FE27	FE2	FE16	FE5	FE21	FE17	FE18	FE3	FE8	FE28	FE29	FE24	FE4	FE10	FE58	FE54	FE60	FE59	FE55	FE47	FE48	FE49	FE25	FE26	FE50	FE30	FE51	FE52	FE31	FE32	FE33	FE53	FE34	FE35	FE36	FE37	FE42	FE11	FE13	FE61	FE43	FE12	FE46
IMG_0757	0	0	0	0	0	0	4.95	0	0	0	0	0	0	0	0	0	36.52	0	9.56	0	0	0	0	0	0	0	1.7	0	0	0	0	0	1.21	0	0	0	0	1.84	0	0	1.89	0	0	0	0	0.98	0	0	0
IMG_0758	0	0	0	0	0	0	1.67	0	0	0	0	0	0	0	0	0	31.49	0	31.1	0	0	0	0	0	0	0	0	0	0	0	0	0.54	0.13	0	0	0.38	0	0.83	0	0	0.39	0	0	0	0	3.55	0	0	0
IMG_0759	0	0	0	0	0	0	6.25	0	0	0	0	0	0	0	0	0	8.54	0	50.96	0	0	0	0	0	0	0	0	0	0	0	0	0	0	0	0	0	0	0	0	0	0.76	0	0	0	0	3.9	0	0	0
IMG_0761	0	0	0	0	0	0	8.45	0	0	0	0	0	0	0	0	0	29.94	0	31	0	0	12.14	0.1	0	0	0	0	0	0	0	0	0	0	0	0	0.17	0	0.52	0	0	0.99	0	0	0	0	1.41	0	0	0
IMG_0764	0	0	0	0	0	0	3.67	0	0	0	0	0	0	0	0	0	23.98	0	1.24	0	0	0	0	0	0	0	0	0	0	0	0	0	0	0	0	0	0	0	0	0	0.95	0	0	0	0	0.79	0	0	0
IMG_0766	0	0	0	0	0	0	2.29	0	0	0	0	0	0	0	0	0	27.29	0	2.31	0	0	0	0	0	0	0	0	0	0	0	0	0	0	0	0	0	0	0	0.16	1.65	2.4	0	0	0	0	2.98	0	0	0
IMG_0769	0	0	0	0	0	0	21	0	0	0	0	0	0	0	0	0.4	26	0	5	0	0	0	0	0	0	0	0	0	0	0	0	0	1.96	0	0	0	0	0	1.29	0	0	0	0	0	0	0.62	0	0	0
IMG_0772	0	0	0	0	0.36	0	3.97	0	0	0	0	0	0	0	0	0	18.96	0	56.18	0	0	0	0.08	0	0	0	0	0	0	0	0	0	0	0	0	0	0	0	0	0	0.79	0	0	0	0	0	0	0	0
IMG_0773	0	0	0	0	0	0	12.51	0	0	0	0	0	0	0	0	0	7.49	0	65.3	0	0	0	2	0	0	0	0	0	0	0	0	0	0	0	0	0	0	0	0	0	0	0	0	0	0	0	0	0	0
IMG_0775	0	0	0	0	0	0	10.8	0	0	0	0	0	0	0	0	0	29	0	40.72	0	5.26	0	0.53	0	0	0	0	0	0	0	0	0.32	0	0	0	0	0	0	0.7	0	0.35	0	0	0	0	0.27	0	0.18	0
IMG_0813	0	0	0	0	0.34	0	4	0	0	0	0	0	0	0	0	0	1.8	0	93.61	0	0	0	0	0	0	0	0	0	0	0	0	0	0	0	0	0	0	0	0	0	0	0	0	0	0	0.13	0	0	0
IMG_0814	0	0	0	0	1.13	0	2.38	0	0	0	0	0	0	0	0	0	0.7	0	92.78	0	0	0	0	0	0	0	0	0	0	0	0	0	0	0	0	0	0	0	0	0	0	0	0	0	0	0.07	0	0	0
IMG_0816	0	0	0	0	0.7	0	21.98	0	0	0	0	0	0	0	0	0	22.2	0	52.76	0	0	0	0	0	0	0	0	0	0	0	0	0	0	0	0	0	0	0	0	0	0.48	0	0	0	0	0.18	0	0	0
IMG_0817	0	0	0	0	0.23	0	9	0	0	0	0	0	0.26	0	0	0	0.44	0	88.56	0	0	0	0	0	0	0	0	0	0	0	0	0	0	0	0	0	0	0	0	0	0	0	0	0	0	0	0	0	0
IMG_0818	0	0	0	0	0	0	4	0	0	0	0	0	0	0	0	0	10.8	0	84.76	0	0	0	0	0	0	0	0	0	0	0	0	0	0	0	0	0	0	0	0	0	0	0	0	0	0	0	0	0	0
IMG_0819	0	0	0	0	2.66	0	23.23	0	0	0	0	0	0	0	0	0	10.58	0	61.39	0	0	0	0	0	0	0	0	0	0	0	0	0	0	0	0	0	0	0	0	0	0.17	0	0	0	0	0.66	0	0	0
IMG_0820	0	0	0	0	2.59	0	27.68	0	0	0	0	0	0	0	0	0	20.3	0	46.99	0	0.77	0	0	0	0	0	0	0	0	0	0	0	0	0	0	0	0	0	0	0	0	0	0	0	0	0	0	0	0
IMG_0821	0.35	0	0	0	0.31	0	41.86	0	0	0	0	0	0	0	0	0	10.42	0	42.68	0	0	0	0	0	0	0	0	0	0	0	0	0	0	0	0	0	0	0	0	0	0	0	0	0	0	0.25	0	0	0
IMG_0822	0	0	0	0	0.68	0	6.93	0	0	0	0	0	0	0	0	0	0	0	87.55	0	0	0	0	0	0	0	0	0	0	0	0	0	0	0	0	0	0	0	0	0	0	0	0	0	0	0	0	0	0
IMG_0823	0	0	0	0	1.62	0	12.96	0	0	0	0	0	0	0	0	0	10.34	0	69.03	0	0	0	0	0	0	0	0	0	0	0	0	0	0	0	0	0	0	0	0	0	0	0	0	0	0	0	0	0	0
IMG_0843	0	0	0	0	0	0.32	38.12	0	0	0	0	0	0.07	0	0	0	8.57	0	6.57	0	0	0	0	0	0	0	0	0	0	0	0	0	0	0	0	0.33	0	0	0	0	0	0	0	0	0	0	0	0	0
IMG_0845	0	0	0	0	0.77	0	18	0	0	0	0	0	0	0	0	0	2.4	0	16	0	0	0	0	0	0	0	0	0	0	0	0	0	0	0	0	0	0	0	0	0	0	0	0	0	0	0	0	0	0
IMG_0847	0	0	0	0	0	0	0.3	0	0	0	0	0	0	0	0	0	4	0	16	0	0	0	0	0	0	0.1	0	0	0	0	0	0	0	0	0	0	0	0	0	0	0	0	0	0	0	0	0	0	0
IMG_0850	0	0	0	0	0	0	13.7	0	0	0	0	0	0	0	0	0	0.88	0	19	0	0	0	0	0	0	2.2	0	0	0	0	0	0	0	0	0	0	0	0	0	0	0.14	0	0	0	0	0	0	0	0
IMG_0852	0	0	0	0	0	0	30	0	0	0	0	0	0	0	0	0	0.5	0	13	0	0	0	0	0	0	0.23	0	0	0	0	0	0	0	0	0	0.83	0	0	0	0	0.04	0	0	0	0	0	0	0	0
IMG_0854	0	0	0	0	0	0	25	0	0	0	0	0	0	0	0	0	0.5	0	25	0	0	0	0	0	0	0	0	0	0	0	0	0	0	0	0	0	0	0	12	0	0	0	0	0	0	0	0.4	0	0
IMG_0856	0	0	0	0	0	0	35	0	0	0	0	0	0	0	0	0	2.03	0	4	0	0	0	0	8	0	0	0	0	0	0	0	0	0	0	0	0	0	0	0	0	1.01	0	0	0	0	0	0	0	0
IMG_0857	0	0	0	0	0.1	0	13.1	0	0	0	0	0	0	0	0	0.2	9.42	0	35	0	0	0	2.23	0	0	0	0	0	0	0	0	0	0	0	0	0	0	0	5.26	0	0	0	0	0	0	0	0	0	0
IMG_0862	0	0	0	0	0.28	0	40	0	0	0	0	0	0	0	0	0	0.24	0	10	0	0	0	0	0	0	0.63	0	0	0	0	0	0	0	0	0	3.5	0	0	0.4	0	0.27	0	0	0	0	0	0	0	0
IMG_0863	0	0	0	0	0	0	10	0	0	0	0	0	0	0	0	0	1.35	0	5	0	0	0	0	0	0	1.25	0	0	0	0	0	0	0	0	0	0	0	0	0	0	0	0	0	0	0	0	0	0	0
IMG_0913	0	0	0	0	0	0	1	0	0	1	0	0	0	0	0	0	20	0	63.02	0	0	0	0	0	0	0.41	0	0	0	0	0	0	0	0	0	2.2	0	0	0	0	1.94	0	0	0	0	0	0	0	0
IMG_0914	0	0	0	0	0.2	0	1.3	0	0	3	0	0	0	0	0	0	40	0	41.38	0	6.02	0	0	0	0	0	0	0	0	0	0	0	0	0	0	0	0	0.18	0	0	0.8	0	0	0	0	0	0	0	0
IMG_0917	0	0	0	0	0	0	2.4	0	0	1.8	0	0	0	0	0	0	45.63	0	34.35	0	0.6	0	0	0	0	0	0	0	0	0	0	0	0	0	0	0	0	0	0.12	0	0	0	0	0	0	0	0	0	0
IMG_0918	0	0	0	0	0	0	1.8	0	0	0	0	0	0	0	0	0	63.8	0	24.03	0	0	0	0	0	0	0	0	0	0	0	0	0	0	0	0	0	0	0	0	0	3.26	0	0	0	0	0	0	0	0
IMG_0920	0	0	0	0	0	0	1.7	0	0	0	0	0	0	0	0	0	31	0	55.03	0	3.06	0	0	0	0	0	0	0	0	0	0	0	0	0	0	0	0	0	0	0	0.41	0	0	0	0	0	0	0	0
IMG_0922	0	0	0	0	0	0	2.04	0	0	4.68	0	0	0	0	0	0	32	0	52.95	0	0	0	0	0	0	0	0	0	0	0	0	0	0	0.2	0	0	0	0	0	0	0	0	0	0	0	0	0	0	0
IMG_0924	0	0	0	0	4	0	1	0	0	0	0	0	0	0	0	0	25	0	57.87	0	2.43	0	0.25	0	0	0	0	0	0	0	0	0	0	0	0	0	0	0	0	0	1	0	0	0	0	0	0	0	0
IMG_0931	0	0	0	0	0	0	4	0	0	0.4	0	0	0	0	0	0	36	0	46.22	0	2.16	0	1.32	0	0	0	0	0	0	0	0	0	0	0	0	0	0	0	0	0	1.4	0	0	0	0	0	0	0	1.5
IMG_0932	0	0	0	0	0.3	0	2.2	0	0	0	0	0	0	0	0	0	18	0	10	0	0	0	1.72	0	0	0	0	0	0	0	0	0	0	0	0	0	0	0	0	0	0	0	0	0	0	0	0	0	0
IMG_0928	0	0	0	0	0.17	0	3.5	0	0	0	0	0	0	0	0	0	48	0	34.95	0	0.2	0	0	0	0	0	0	0	0	0	0	0	0	0	0	0	0	0	0	0	0	0	2.12	0	0	0	0	0	0
IMG_2080	0	0	2.24	0	50	0	0.64	0	0	0	0	0	0	0	0	0	12.07	0	10.6	0	0	0	0	0	0	0	0	0	0	0	0	0	0	0	0	0	0	0	0	0	0	0	0	0	0	0	0	0	0
IMG_2081	0	0	0.13	0	12	0	0.58	0	0	0	0	0	0	0	0	0	24.7	0	26.08	0	0	0	0	0	0	0	0	0	0	0	0	0	0	0	0	0	0	0	0	0	0	0	0	0	0	0	0	0	0
IMG_2085	0	0	0.54	0	46	0	1	0	0	0	0	0	0	0	0	0	16	0	26.76	0	0	0	0	0	0	0	0	0	0	0	0	0	0	0	0	0	0	0	0	0	0	0	0	0	0	0	0	0	0
IMG_2087	0	0	0	0	55.55	0	13	0	0	0	0	0	0	0	0	0	9	0	20.75	0	0	0	0	0	0	0	0	0	0	0	0	0	0	0	0	0	0	0	0	0	0	0	0	0	0	0	0	0	0
IMG_2090	0	0	0.08	0	52	0	4.4	0	0	0	0	0	0	0	0	0	15.9	0	27.62	0	0	0	0	0	0	0	0	0	0	0	0	0	0	0	0	0	0	0	0	0	0	0	0	0	0	0	0	0	0
IMG_2091	0	0	0.46	0	26	0	7.03	0	0.6	0	0	0	0.12	0	0	0	34.4	0	29.09	0	0	0	0	0	0	0	0	0	0	0	0	0	0	0	0	0	0	0	0	0	0	0	0	0	0	0	0	0	0
IMG_2093	0	0	0.63	0	52.13	0	16.64	0	0	0	0	0	0	0	1.8	0	6.23	0	6	0.95	0	0	0	0	0	0	0	0	0	0	0	0	0	0	0	0	0	0	0	0	0	0	0	0	0	0	0	0	0
IMG_2095	0	0	0.17	0	62	2.15	3.35	0	0	0	0	0	0	0	0	0	22.5	0	6.83	0	0	0	0	0	0	0	0	0	0	0	0	0	0	0	0	0	0	0	0	0	0	0	0	0	0	0	0	0	0
IMG_2102	0	0	1.24	0	22	0	14.08	0	0	0	0	0	0	0	0	0	29.13	0	29.68	0	0	0	0	0	0	0	0	0	0	0	0	0	0	0	0	0	0	0	0	0	0	0	0	0	0	0	0	0	0
IMG_2103	0	0	1.7	0	2	0	2.14	0.5	0.9	0	0	0	0	0	0	0	51	0	28.49	0	0	0	0	0	0	0	0	0	0	0	0	0	0	0	0	0	0	0	0	0	0	0	0	0	0	0	0	0	0
IMG_2197	0	0	0.95	0	35	0	10.5	2.5	0	0	0	0	0	0	0	0	0	0	41.32	0	0	0	0	0	0	0	0	0	0	0	0	0	0	0	0	0	0	0	0	0	0	0	0	0	0	0.08	0	0	0
IMG_2198	0	0	3.57	0	1	0	54.78	0	0	0	0	0	0.2	0	0	0	3.4	0	32.08	0	0	0	0	0	0	0	0	0	0	0	0	0	0	0	0	0	0	0	0	0	0	0	0	0	0	0	0	0	0
IMG_2203	0	0	0.91	5.77	57	0	11.9	0	0	0	0	0	0	0	0	0	9.7	0	13.16	0	0	0	0	0	0	0	0	0	0	0	0	0	0	0	0	0	0	0	0	0	0	0	0	0	0	0.14	0	0	0
IMG_2207	0	0	0.46	0	35	0	12	0	0	0	0	0	0	0	0.56	0	10.3	0	40.38	0	0	0	0	0	0	0	0	0	0	0	0	0	0	0	0	0	0	0	0	0	0	0	0	0	0	0	0	0	0
IMG_2209	0	0	1.37	0	24	0	46.46	0	0.5	0	0	0	0.2	0	0	0	0	0	12.86	0	0	0	0	0	0	0	0	0	0	0	0	0	0	0	0	0	0	0	0	0	0	0	0	0	0	0	0	0	0
IMG_2210	0	0	0.4	0	30	0	3.43	0	0	0	0	0	0	0	0	0	34	0	9.73	0	0	0	0	0	0	0	0	0	0	0	0	0	0	0	0	0	0	0	0	0	0	0	0	0	0	0.04	0	0	0
IMG_2214	0	0	1.18	10.5	43.92	0	17.4	0	0	0	0	0	0	0	4.6	0	16	0	2	0	0	0	0	0	0	0	0	0	0	0	0	0	0	0	0	0	0	0	0	0	0	0	0	0	0	0	0	0	0
IMG_2217	0	0	3.1	0	18	0	25	0	0	0	0	0	0	0	0	0	9.5	0	36.69	0.67	0	0	0	0	0	0	0	0	0	0	0	0	0	0	0	0	0	0	0	0	0	0	0	0	0	0	0	0	0
IMG_2200	0	0	1.98	1.54	5	0	47.5	0	0	0	0	0	0.4	0	0	0	5.03	0	28.79	0	0	0	0	0	0	0	0	0	0	0	0	0	0	0	0	0	0	0	0	0	0	0	0	0	0	0	0	0	0
IMG_2205	0	0	2.12	0	52	0	16.23	0.41	0	0	0	0	0	0	0	0	14.06	0	12.58	0	0	0	0	0	0	0	0	0	0	0	0	0	0	0	0	0	0	0	0	0	0	0	0	0	0	0	0	0	0
IMG_2919	0	0	21.03	0	4	0	3.3	0	0	0.9	0.45	0	0	0	0	0	3.6	0	57.92	0	0	0	0	0	0	0	0	0	6	0	0	0	0	0	0	0	0	0	0	0	0	0	0	0	0	0	0	0	0
IMG_2921	0	0	17.5	0	4.4	0	6	1.12	0	0	0	0	0	0	0	0	0.3	0	67.68	0	0	0	0	0	0	0	0	0	0	0	0	0	0	0	0	0	0	0	0	0	0	0	0	0	0	0	0	0	0
IMG_2923	0	0	0.15	0	43	0	22	0	0	0.41	0	0	0	0	3	0	10	0	20.73	0	0	0	0	0	0	0	0	0	0	0	0	0	0	0	0	0	0	0	0	0	0	0	0	0	0	0	0	0	0
IMG_2926	0	0	1.26	0	1.6	0	35	0	0	0.82	0	0	0	0	0	0	5.5	0	46.46	0	0	0	0	0	0	0	0	0	0.2	0	0	0	0	0	0	0	0	0	0	0	0	0	0	0	0	0	0	0	0
IMG_2930	0	0	5.8	0	0.17	0	31	0.13	0	2.1	0	0	0.15	0	0.23	0	5	0	50.57	0.19	0	0	0	0	0	0	0	0	0	0	0	0	0	0	0	0	0	0	0	0	0	0	0	0	0	0.07	0	0	0
IMG_2931	0	0	0	0	21	0.67	27	0	0	0	0	0	0	0	0	0	2.28	0	41.04	0.81	0	0	0	0	0	0	0	0	0	0	0	0	0	0	0	0	0	0	0	0	0	0	0	0	0	0	0	0	0
IMG_2934	0	0	0.22	0	15	5.35	6.5	0	0	2.3	0	0	0.14	0	0	0.53	20.5	0	38.74	0	0	0	0	0	0	0	0	0	0	0	0	0	0	0	0	0	0	0	0	0	0	0	0	0	0	0.26	0	0	0
IMG_2937	0	0	0	0	3.45	0	17	0	0	0.8	0.36	0	0.7	5.2	0	0	21	0	36.24	0	0	0	0	0	0	0	0	0	0	0	0	0	0	0	0	0	0	0	0	0	0	0	0	0	0	0.21	0	0.08	0
IMG_2939	0	0	3	0	18	0.29	11	0	0	0	0	0	0.3	5.1	0	1.44	9	0	43.03	1	0	0	0	0	0	0	0	0	0	0	0	0	0	0	0	0	0	0	0	0	0	0	2	0	0	0.22	0	0	0
IMG_2927	0	0	5.5	0	2.18	0	26	0	0	0	0.3	2	0	0	0	0	1.5	0	59.12	0	0	0	0	0	0	0	0	0	0	0	0	0	0	0	0	0	0	0	0	0	0	0	0	0	0	0	0	0	0
IMG_2978	0	0	0.5	0	43	0	12	0	0	0	0	0	0	0	0	0.28	2	0	32.58	0	0	0	0	0	0	0	0	0	0	0.1	0	0	0	0	0	0	0	0	0	0	0	0	0	0	0	0	0	0	0
IMG_2981	0.28	0	3.5	0	34	0	4	0	0	0	0	0	0	0	0	0	2	0	51.55	0	0	0	0	0	0	0	0	0	0	1.51	0	0	0	0	0	0	0	0	0	0	0	0	0	0	0	0	0	0.16	0
IMG_2983	0	0	0.74	0	35.11	0	10.2	0	0	0	0	0	0	0	0	0.1	5.1	0	43.55	0	0	0	0	0	0	0	0	0	0	0	0	0	0	0	0	0	0	0	0	0	0	0	0	0	0	0	0	0	0
IMG_2999	0	0	4.74	0	0	0	12	0	0	1.16	0	0	0	0	0	0	21	0	59.28	0.1	0	0	0	0	0	0	0	0	0	0	0	0	0	0	0	0	0	0	0	0	0	0	0	0	0	0.17	0	0	0
IMG_2986	0	0	12	3.8	33	0.54	2	0	0	0	0	0	0.53	0	0	0	6.1	0	42.03	0	0	0	0	0	0	0	0	0	0	0	0	0	0	0	0	0	0	0	0	0	0	0	0	0	0	0	0	0	0
IMG_2991	0	0	5	0	31	0	5.4	0	0	0	0	0	0	0	0	0	17	0	41.46	0	0	0	0	0	0	0	0	0	0	0	0	0	0	0	0	0	0	0	0	0	0	0	0	0	0	0	0	0	0
IMG_2992	0	0	0	0	3.6	0	8.18	0	0	0	0	0	0	0	0	3.3	35	0	46.15	0.17	0	0	0	0	0	0	0	0	0	0	0	0	0	0	0	0	0	0	0	0	0	0	0	0	0	0.21	0	0	0
IMG_2995	0	0	0	0	35	0	15	0	0	0	0	0	0	0	0	0.21	18	0	31.79	0	0	0	0	0	0	0	0	0	0	0	0	0	0	0	0	0	0	0	0	0	0	0	0	0	0	0	0	0	0
IMG_2997	0	0	0	0	9.15	0	11	0	0	0.7	0	0	0	0	0	1.53	33	0.38	38.88	0	0	0	0	0	0	0	0	0	0	0	0	0.8	0	0	0	0	0	0	0	0	0	0	0	0	0	0.56	0	0	0
IMG_3000	0	0	0.7	20	1.5	0	4.2	0	0	0	0	0	0	0	0	0	11	0	62.6	0	0	0	0	0	0	0	0	0	0	0	0	0	0	0	0	0	0	0	0	0	0	0	0	0	0	0	0	0	0
IMG_3128	0	0	0.3	0	5	0.4	20.4	0	0	4.06	0	0	0	0	0	0	7.51	0	46.57	9.31	0	0	0	0	0	0	0	0	0	0	0	0	0	0	0	0	0	0	0	0	0	0	0.45	0	0	0	0	0	0
IMG_3129	0	0	24	0	6.21	0	5.71	0	0	0	0	0	0	0	0	0	2.1	0	56.75	0	0	0	0	0	0	0	0	0	0	0	0	0	0	0	0	0	0	0	0.23	0	0	0	3	0	0	0	0	0	0
IMG_3131	0	0	30	0	6.5	0	5.5	0	0	0	0	0	0	0	0	0	0.32	0	54.72	0	0	0	0	0	0	0	0	0	0	0	0	0	0	0	0	0	0	0	0	0	0	0	0.3	0	0	0	0	0	0
IMG_3133	0	0	11.5	0	17.11	2	5.5	0	0	0	0	0	0	0	0	0	1.6	0	51.69	4	0	0	0.2	0	0	0	0	0	0	0	0	0	0	0	0	0	0	0	0	0	0	0	0	0	0	0	0	0	0
IMG_3135	0	0	0	0	5.54	2.5	8.16	0	0	0.55	0	0	0	0	0	0	6.5	0	69.49	0	0	0	0	0	0	0	0	0	0	0	0	0	0.3	0	0	0	0	0	0	0	0	0	1.06	0	0	0	0	0	0
IMG_3137	0	0	1.51	0	7.13	18	5.4	0	0	0.7	0	0	0	0	0	0.4	18	0	43.99	0	0	0	0	0	0	0	0	0	1.5	0	0	0	0	0	0	0	0	0	0	0	0	0	1.4	0	0	0	0	0	0
IMG_3139	0	0	1.3	0	14.21	1.24	3.15	0	0	4.3	0	0	0	0	0	0	4.3	0	43.93	0	0	0	0	0	0	0	0	0	21	0	0	0	0	0	0	0	0	0	0	0	0	0	1	0	0	0.08	0	0	0
IMG_3142	0	0	0.2	0	4.02	8.5	8.6	0	0	3.43	0	0	9.5	0	0	0	27	0	35.29	0	0	0	0	0	0	0	0	0	0	0	0	0	0	0	0	0	0	0	0	0	0	0	1.4	0	0	0	0	0	0
IMG_3143	0	0	2.6	0	6.71	21.2	0.5	0	0	0.8	0	0	0.2	0	0	0	10.52	0	50.47	0	0	0	0	0	0	0	0	0	0	0	0	1	0	0	0	0	0	0	0	0	0	0	0	0	0	0	2	0	0
IMG_3147	0	0	11	0	6.11	9.2	11.5	0	0	0	0	0	0	0	0	0	6.7	0	53.26	0	0	0	0	0	0	0	0	0	0	0	0	0	0	0	0	0	0	0	0	0	0	0	0	0	0	0	0	0	0
IMG_3211	0	0	0	0	2	0	6.7	0	0	0	0	0	0	0	0	0.33	73	0	13.53	0	0	0	0	0	0	0	0	0	0	0	0	0	0	0	0	0	0	0	0	0	0	0	0	0	0	0.23	0	0	0
IMG_3213	0	0	0	0	11.1	0.74	31.23	0	0	0	0	0	0	0	0	0	21	0	31.47	0	0.21	0	0	0	0	0	0	0	0	0	0	0	0.35	0	0	0	0	0	0	0	0	0	0	0	0	0	0	0	0
IMG_3195	0	0	0	0	0.4	0	18	0	0	0	0	0	0	0	0	0	42	0	22.09	7	0	0	0.4	0	0	0	0	0	0	0	0	0	0	0	0	0	0	0	0.3	0	0.5	0	1	0	0	0.09	0	0	0
IMG_3197	0	0	0	0	0	0	13	0	0	0	0	0	0	0	0	2.7	57	0	21.13	0.6	0	0	0	0	0	0	0	0	0	0	0	0.6	0	1.05	0	0	0	0.5	0	0	0	0	0	0	0	0.25	0	0	0
IMG_3200	0	0	0	0	0	0	14	0	0	0	0	0	0	0	0	0.17	61	0	15.27	0	0	0	0	0	0	0	0	0	6.4	0	0	0	0	0	0	0	0	0	0	0	0.33	0	0	0	0	0.43	0	0	0
IMG_3201	0	0	0	0	0	2.02	2	0	0	21	0.5	0	0	0	0	0	25	0	46.94	0	0	0	0.26	0	0	0	0	0	0	0	0	0	0	0	0	0	0	0	0.4	0	0	0	0	0	0	0.21	0	0	0
IMG_3203	0	0	0.44	0	12	1.1	9.01	0	0	0	1.11	0	0	0	0	0.5	31.76	0	37.75	0	0	0	0	0	0	0	0	0	0	0	0	0	0	1	0	0	0	0	1.73	0	0	0	0	0	0	0	0	0	0
IMG_3206	0	0	0	0	1.53	2.72	6	0	0	29	2.41	0	0	0	0	0	28	0	28.34	0	0	0	0	0	0	0	0	0	0	0	0	0	0	0	0	0	0	0	0	0	0	0	0	0	0	0	0	0	0
IMG_3208	0	0	0	0	0	0	0	0	0	0	0	0	0	0	0	0	1.68	0	11.79	0	0	0	0	0	0	0	0	0	85.32	0	0	0	0	0	0	0	0	0	0	0	0.23	0	0	0	0	0.28	0	0	0
IMG_3192	0	0	10	0	0.4	0	4	0	0	11.53	0.4	0	0	0	0	0	8	0	64.04	0	0	0	0	0	0	0	0	0	0	0	0	0	0	0	0	0	0	0	0	0	0	0	0	0	0	0	0	0	0
IMG_4215	0	0	0	0	0	0	10.6	0	0	0	0	0	0	0	0	0	27.6	0	20.6	0	0	0	0	0	0	0	0	0	1.6	0	0	0	0	0	0	0	0	1.6	0	0	1.6	0	0	0	0	0	0	0	0
IMG_4222	0	0	0	0	1.6	0	41.1	0	0	0	0	0	0	0	0	0	26.1	0	22.5	0	0	0	0	0	0	0	0	0	1.1	0	0	0	0	0	0	0	0	0	0	0	0	0	0	0	0	0	0	0	0
IMG_4224	0	0	0	0	7.6	0	31.1	0	0	0	0	0	0	0	0	0	17.6	0.05	29.1	0	0	0	0	0	0	0	0	0	0	0	0	0	0	0	0	0.3	0	0	0	0	0	0	0	0	0	0	0	0	0
IMG_4226	0	0	0	0	7	0	28	0	0	0	0.5	0	0	0	0	0	20	0	18.5	0	0	0	0	0	0	0	0	0	0	0	0	0	0	0	0	0	0	0	0	0	0	0	0	0	0	0	0	0	0
IMG_4227	0	0	0	0	1	0	34	0	0	0	0	0	0	0	0	0	22	0	31	0	0	0	0	0	0	0	0	0	0	0	0	0	0	0	0	0	0	0	0	0	0	0	0	0	0	0	0	0	0
IMG_4232	0	0.5	0	0	2.5	0	35	0	0	0	0.5	0	0	0	0	0	22	0	21.5	0	0	0	0	0	0	0	0	0	0	0	0	0	0	0	0	0	0	0	1	0	2	0	0	0	0	0	0	0	0
IMG_4234	0	0	0	0	1	0	36	0	0	0	0.5	0	0	0	0	0	20	0	25.9	0	0	0	0	0	0	0	0	0	0	0	0	0	0	0	0	0	0	0	0	0	0	0.1	0	0	0	0.2	0	0	0
IMG_4236	0	0	0	0	6.5	0	49	0	0	0	0	0	0	0	0	0	8	0	15	0	0	0	0	0	0	0	0	0	0	0	0	0	0	0	0	0	0	0	0	0	3	0	5	0	0	0.1	0	0	0
IMG_4237	0	0.05	0	0	2.5	0	48	0	0	0	0	0	0	0	0	0	17	0	18.5	0	0	0	0	0	0	0	0	0	3	0	0	0	0	0	0	0.5	0	0	0	0	0	0	0	0	0	0	0	0	0
IMG_4240	0	0	0	0	4	0	26	0	0	0	0	0	0	0	0	0	32	0	22	0	0	0	0	0	0	0	0	0	0	0	0	0	0	0	0	0	0	0	0	0	2	0	0	0	0	0	0	0	0
IMG_3769	0	0	0	0	0	0	27.6	0	0	0	0	0	0	0	0	0	17.6	0	13.1	0	0	0	0	0	0	0	0	0	0	0	0	0	0	1.1	0	1.1	0	0	0	0	0	0	0	0	0	0	0	0	0
IMG_3771	0	0	0	0	0	0	66.1	0	0	0	0	0	0	0	0	0	11.6	0	5.6	0	0	0	0.6	0	0	0	0	0	0	0	0	0	0	0	0	1.1	0	0	0.6	0	0	0	0	0	0	0	0	0	0
IMG_3772	0	0	0	0	0	0	34	0	0	0	0	0	0	0	0	0	5	0	14.5	0	0	0	0	0	0	0	1	0	0	0	0	0	0	0	0	3.5	0	0	1	0	1	0	0	0	0	0	0	0	0
IMG_3776	0	0	0	0	0	0	75	0	0	0	0	0	0	0	0	0	10	0	2.5	0	0	0	0	0	0	0	0	0	1.5	0.5	0	0	0	0	1.5	1	0	0	0	0	0	0	0	0	0	0	0	0	0
IMG_3778	0	0	0	0	2	0	39	0	0	0	0	0	0	0	0	0	39	0	11.8	0	0	0	0	0	0	0	1.2	0	0	0	0	0	0	0	0	1	0	0	0	0	0.5	0	0	0	0	0	0	0	0
IMG_3781	0	0.5	0	0	2	0	22	0	0	0	0	0	0	0	0	0	45	0	8.5	0	0	0	1	0	0	0	2	0	0	0	0	0	1	0	0	0.5	0	0	1.5	0	0	0	0	0	0	0	0	0	0
IMG_3783	0	0	0	0	6	0	29.5	0	0	0	0	0	0	0	0	0	40.5	0	9.5	0	1.1	0	0	0	0	0	0	0	2.1	0	0	0	0	0	0	1.1	0	0	0	0	0	0	0	0	0	0.6	0	0	0
IMG_3785	0	0	0	0	2.5	0	24.5	0	0	0	0	0	0	0	0	0	21.5	0	16	0	0	0	0.5	0	0	0	0	0.5	0	0	0	0	0	0	0	0.5	0	0	0	0	1.5	0	0	0	0	0.03	0	0	0
IMG_3788	0	0	0	0	5.1	0	23.5	0	0	0	0	0	0	0	0	0	21.5	0	10.6	0	0	0	0.6	0	0	0	0	0	0	0	0	0	0	0	0	1.1	0	0	0	0	3.1	0	0	0	0	0	0	0	0
IMG_3790	0	0	0	0	1.6	0	11.6	0	0	0	0	0	0	0	0	0	10.8	0	8.5	0	0	0	0	0	0	0	0	0	30	0	0	0	0	0	0	1	0	0	1	0	3	0	0	0	0	1	0	0	0
IMG_0779	0	0	0	0	0	0	0.63	0	0	0	0	0	0	0	0	0	16.32	0	55.57	0	0	0	0	0	0.18	0	3.1	0.13	0	0	0	0.78	0.97	0	0	0.15	0	0	2.04	0	4.45	0	0	0	0	4	0	0.21	0
IMG_0780	0	0	0	0	0	0	1.65	0	0	0	0	0	0	0	0	0.26	15	0	53.24	0	0	0	1.11	0	0	0	0	0	0	0	0	0	0	0	0	0.3	0	3.45	0	0.38	3.15	0	0	0	0	11.08	0	0	0
IMG_0782	0	0	0	0	0	0	7.94	0	0	0	0	0	0	0	0	0.53	11.43	0	39.88	0	0	0	0.88	0	0	0	0	0	0	0	0	0	0	0	0	0.5	0	20.95	2.36	0	1.61	0	0	0	0	1.79	0	0.09	2.22
IMG_0785	0	0	0	0	0	0	0	0	0	0	0	0	0	0	0	0	4.55	0	71.87	0	0	0	0	2.43	0	0	0	0	0	0	0	0	0	0	0	0.15	0	0.21	0	0	1.03	0	0	0	0	2.24	0	0	0
IMG_0786	0	0	0	0	0	0	11.46	0	0	0	0	0	0	0	0	0	9.86	0	47.86	0	0	0	0	0	0.86	0	0	0	0	0	0	0	0	0	0	0	0	8.97	0.87	1.39	9.93	0	0	0	0	0.82	0	0	0
IMG_0788	0	0	0	0	0	0	0	0	0	0	0	0	0	0	0	0	25	0	38.23	0	0	0	0.94	0	0	0	0	0	0	0	0	0	0	0	0	0	0	0	11.4	0	13	0	0	0	0	0	0	0	0
IMG_0041	0	0	0	0	0	0	2.24	0	0	0	0	0	0	0	0	0.41	20.7	0	67.18	0	0	0	0	0	0	0	0	0	0	0	0	0	0	0	0	0	0	0.24	0	0	5.01	0	0	0	0	0	0	0	0
IMG_0792	0	0	0	0	0	0	6	0	0	0	0	0	0	0	0	0	23	0	36.77	0	0	0	0	0	0	0	0	0	0	0	0	0	0	0	0	0	0	3	0	0	0	0	0	0	0	7.4	0	0	0
IMG_0795	0	0	0	0	0	0	1.66	0	0	0	0	0	0	0	0	0	40.66	0	35.82	0	0	0	0	2.46	0	0	0	0	0	0	0	0	0	0	0	0.53	0	0	0	0	0.49	0	0	0	0	10.82	0	0	0
IMG_0796	0	0	0	0	0	0	5.41	0	0	0	0	0	0	0	0	0	12	0	62.62	0	0	0	1.47	0	0	0	0	0	2.94	0	0	0	0	0	0	0	0	0	0	0	0	0	0	0	0	0.28	0	0	0
IMG_0827	0	0	0	0	1.3	0	11	0	0	0	0	0	0	0	0	0	11.6	0	64.66	0	0	0	0.3	0	0	0	0	0	1.68	0	0	0	0	0	0	0	0	0	0.17	0	0.86	0	0	0	0	0	0	0	0
IMG_0828	0	0	0	0	0	0	16	0.9	0	0.16	0	0	0	0	0	0.25	35	0	41.72	0	0	0	0	0	0	0	0	0	0	0	0	0	0	0	0	0	0	0	0	0	0	0	0	0	0	0.37	0	0	0
IMG_0829	0	0	0	0	0	0	13	0	0	0	0	0	0	0	0	0	24	0	52.78	0	0	0	0	0	0	0	0	0	1	0	0	0	0	0	0	0	0	0	0	0	0.58	0	0	0.5	0	0	0	0	0
IMG_0833	0	0	0	0	0	0	8.5	4.5	0	0	0	0	0	0	0	0.2	12.17	0	67.3	0	0	0	0	0	0	0	0	0	0	0	0	0	0	0	0	0	0	0	0	0	0	0	0	0	0	0	0	0	0
IMG_0835	0	0	0	0	0	0	10	0	0	0.13	0	0	0	0	0	0	9.41	0	54.31	0	0	0	0	0	0	0	0	0	0	0	0	0	0	0	0	0	0	0	0	0	0.62	0	0	0	0	8.06	0	0	0
IMG_0836	0	0	0	0	0	0	16	0	0	0	0	0	0	0	0	0	27	0	46.12	0	0	0	0	0	0	0	0	0	0	0	0	0	0	0	0	0	0	0	1.07	0	0	0	0	0.13	0	0.27	0	0	0
IMG_0837	0	0	0	0	0	0	10.54	0.5	0	0	0	0	0	0	0	0	26.46	0	51.02	0	0	0	0	0	0	0	0	0	0	0	0	0	0	0.62	0	0	0	0	0	0	0	0	0	0	0	1.03	0	0	0
IMG_0841	0	0	0	0	0.83	0	17	0	0	0	0	0	0	0	0	0.4	6.8	0	70.54	0	0	0	0	0	0	0	0	0	0	0	0	0	0	0	0	0	0	0	0	0	0	0	0	0	0	0.23	0	0	0
IMG_0842	0	0	0	0	0	0	9.42	0	0	0	0	0	0	0	0	0	16.19	0	50.53	0	0	0	0	0	0	0	0	0	0	0	0	0	0	0	0	0	0	0	0.26	0	0	0	0	0	0	0.13	0	0	0
IMG_0839	0	0	0	0	1.37	0	2.5	0	0	0	0	0	0	0	0	0	0	0	92.13	0	0	0	0	0	0	0	0	0	0	0	0	0	0	0	0	0	0	0	0	0	0	0	0	0	0	0	0	0	0
IMG_0892	0	0	0	0	0	0	22	0	0	0	0	0	0	0	0	0	2.93	0	39.55	0	0	0	0	0	0	0	0	0	0	0	0	0	3.3	0	0	18.26	0	0	3.08	0	5.3	0	0	0	0	0	0	0	0
IMG_0890	0	0	0	0	0	0	3	0	0	0.3	0	0	0	0	0	0	37	0	46.33	0	0	0	0	0	0	0	0	0.23	1.33	0	0	0	0	0	0	0	0	0	2.97	0	1.22	0	0	0	0	0	0	0	0
IMG_0886	0	0	0	0	0	0	2	0	0	0	0	0	0	0	0	0.22	24	0	55	0	0	0	0.54	0	0	0	0	0	0	0	0	0	0	0	0	5.77	0	0	2	0	5.43	0	0	0.04	0	0	0	0	0
IMG_0883	0	0	0	0	0	0	4	0	0	0	0	0	0	0	0	0	3	0	55.67	0	0	0	0	0	0	0	0	0	0	0	0	0	5.5	3.6	0	0	0	0	8.1	0	3.7	0	0	0	0	0	0	0	0
IMG_0881	0	0	0	0	0	0	4	0	0	0	0	0	0	0	0	0	25	0	46.83	0	0	0	0.15	0	0	0	0	0	0	0	0	0	0	0	0	0	0	0	0	0	2.4	0	0	0	0	0	0	0	0
IMG_0879	0	0	0	0	0	0	2	0	0	0	0	0	0	0	0	0.35	0.8	0	52.6	0	0	0	0	1.2	0.4	0	0	0	0	0	0	0	0	0	0	0.23	0	0.47	4.9	0.6	7.5	0	0	0.12	0	0	0	0	0.8
IMG_0871	0	0	0	0	0	0	0.4	0	0	0	0	0	0	0	0	0	7.2	0	60.02	0	0	0	0.2	1.63	0	0	0	0	0	0	0	0	0	2.05	0	0	0	0.18	4.02	0	12	0	0	0.08	0	0	0	0	0
IMG_0869	0	0	0	0	0	0	3.43	0	0	0	0	0	0	0	0	0	21	0	58.04	0	0	0	0	0	0	0	0	0	0	0	0	0	0	0	0	0.49	0	0	0	0	7.71	0	0	0	0	0	0	0	0
IMG_0888	0	0	0	0	0	0	1.33	0	0	0	0	0	0	0	0	0	46.05	0	47.59	0	0	0	0	0	0	0	0	0	0	0	0	0	0	0	0	0	0	0	0.65	0	2.38	0	0	0	0	0	0	0	0
IMG_0872	0	0	0	0	0	0	0	0	0	0	0	0	0	0	0	0	0	0	51.23	0	0	0	0	0	0	0	0	0	0	0	0	0	0.5	0	0	0	0	3.31	6	1	22	0	0	0.23	0	0	0	0	0
IMG_0938	0	0	0	0	0	0	3.7	0	0	0.5	0	0	0	0	0	0.14	38.61	0	44.63	0	0	0	0	0	0	0	0	0	0	0	0	0	0	0	0	0	0	0	0	0	4.33	0	0	0	0	0	0	0	0
IMG_0940	0	0	0	0	0	0	2.17	0	0	0.52	0	0	0	0	0	0	27.13	0	54.36	0	0	0	0	0	0	0	0	0	0	0	0	0	0	0	0	0	0	0	0	0	7.16	0	0	0	0	0	0	0	0
IMG_0946	0	0	0	0	0	0	0	0	0	0	0	0	0	0	0	0	34	0	60.9	0	0	0	0	0	0	0	0	0	0	0	0	0	0	0	0	0	0	0	0	0	2	0	0	0	0	0	0	0	0
IMG_0949	0	0	0	0	0	0	1	0	0	0	0	0	0	0	0	0	32	0	53.87	0	0	0	0	0	0	0	0	0	0	0	0	0	0	0	0	0	0	0	0	0	0.23	0	0	0	0	0	0	0	0
IMG_0957	0	0	0	0	0	0	3.45	0	0	0	0	0	0	0	0	0	0.7	0	44.63	0	0	0	2	0	0	0	0.25	0	0	0	3.33	0	0	0	0	0	0	0	5.5	4.49	28	0	0	0	0	0	0	0	0
IMG_0947	0	0	0	0	0	0	10.42	0	0	0	0	0	0	0	0	0.89	29.07	0	50.29	0	0	0	0	0	0	0	0	0	0	0	0	0	0	0	0	0	0	0	0	0	4.13	0	0	0	0	0	0	0	0
IMG_0951	0	0	0	0	0	0	10	0	0	0	0	0	0	0	0	0	18	0	55.25	0	0	0	0	0	0	0	0	0	0	0	0	0	0	0	0	0	0	0	0	0	7.46	0	0	0	0	0	0	0	0
IMG_0952	0	0	0	0	0	0	6	0	0	0	0	0	0	0	0	0	14	0	59.47	0	0	0	0	0	0	0	0	0	0	0	0	0	0	0	0	0	0	0	0	0	11	0	0	0	0	0	0	0	0
IMG_0935	0	0	0	0	0	0	3.5	0	0	0	0	0	0	0	0	0	13	0	57.82	0	0	0	0	0	0	0	0	0	5.1	0	0	0	0	0	0	0	0	0	0	0	3	0	0.8	0	0	0	0	0	0
IMG_0941	0	0	0	0	0	0	6	0	0	2	0	0	0	0	0	0	12	0	47.42	0	0	0.8	0.68	0	0	0	0	0	5	0	0	0	0	0	0	0	0	0	3.5	0	1.2	0	0	0	0	0	0	0	0
IMG_2107	0	0	0	0	0	0	5.07	0	0	0	0	0	0	0	0	0	40	0	44.48	0	0	0	0	0	0	0	0	0	0	0	0	0	0	0	0	0	0	0	0	0	1.22	0	0	0	0	0.02	0	0.08	0
IMG_2110	0	0	0	0	0	0	20	0	0	0	0	0	0	0	0	0	73	0	6.53	0	0	0	0	0	0	0	0	0	0	0	0	0	0	0	0	0	0	0	0.12	0	0.12	0	0	0	0	0	0	0	0
IMG_2112	0	0	0	0	5.35	0	4.1	0	0	0	0	0	0	0	0	0	77.33	0	11.65	0	0	0	0	0	0	0	0	0	0	0	0	0	0	0	0	0	0	0	0	0	0.18	0	0	0	0	0.05	0	0	0
IMG_2115	0	0	0	0	12	0	4.26	0	0	0	0	0	0	0	0	0	26	0	37.22	0	0	0	0	0	0	0	0	0	0	0	0	0	0	0	0	0	0	0	0	0	0	0	0	0	0	0	0	0	0
IMG_2116	0	0	0	0	1.74	0	4	0	0	0	0	0	1.1	0	0	0	13	0	39.07	0	0	0	0	0	0	0	0	0	40.25	0	0	0	0	0	0	0	0	0	0	0	0.37	0	0	0	0	0	0	0	0
IMG_2121	0	0	0	0	3	0	5.6	0	0	0	0	0	0	0	0	0	33.33	0	43.8	0	0	0	0	0	0	0	0	0	0	0	0	0	0	0	0	0	0	0	0	0	0	0	0	0	0	0.11	0	0	0
IMG_2123	0	0	0	0	5	0	10.34	0	0	0.55	0	0	0	0	0	0	37.7	0	44.78	0	0	0	0	0	0	0	0	0	0	0	0	0	0	0	0	0	0	0	0	0	0.4	0	0	0	0	0	0	0	0
IMG_2125	0	0	0	0	3	0	1.7	0	0	0	0	0	0	0	0	0.35	24	0	59.17	0	0	0	0	0	0	0	0	0	0	0	0	0	0.52	0	0	0	0	0	0	0	0.3	0	0	0	0	0.57	0	0	0
IMG_2127	0	0	0	0	25	0	2.5	0	0	0	0	0	0	0	0	0	35	0	35.9	0	0	0	0	0	0	0	0	0	0	0	0	0	0	0	0	0	0	0	0	0	0.13	0	0	0	0	0.25	0	0	0
IMG_2132	0	0	0	0	2	0	10.8	0	0	0	0	0	0	0	0	0	44	0	38.75	0	0	0	0	0	0	0	0	0	0.2	0	0	0	0	0	0	0	0	0	0	0	0	0	0	0	0	0.98	0	0	0
IMG_2246	0	0	0	0	0	0	2.33	0	0	0	0	0	0	0	0	0	0	0	0	0	0	0	0	0	0	0	0	0	83.95	0	0	0	0	0	0	0	0	0	0	0	0	0	0	0	0	0	0	0	0
IMG_2247	0	0	0	0	37	0	20.16	0	0	0	0	0	0	0	0	0	8	0	22.34	0	0	0	0	0	0	0	0	0	0	0	0	0	0	0	0	0	0	0	0	0	0	0	0	0	0	0	0	0	0
IMG_2248	0	0	0	0	8	0	25	4	0	0	0	0	0	0	0	0	10.6	0	36.87	0	0.6	0	0	0	0	0	0	0	0	0	0	0	0	0	0	0	0	0	0	0	0	0	0	0	0	0	0	0	0
IMG_2249	0	0	0.51	0	5	0.71	27	0.55	0	0	0	0	1	0	0	0	2.28	0	54.44	0	0	0	0	0	0	0	0	0	0	0	0	0	0	0	0	0	0	0	0	0	0	0	0	0	0	2.17	0	0	0
IMG_2245	0	0	0	0	0.3	0	19.7	0	0	0	0	0	0.4	0	0	0	42.21	0	30.32	0	0	0	0	0	0	0	0	0	0	0	0	0	0	0	0	0	0	0	0	0	0	0	0	0	0	0.65	0	0	0
IMG_2241	0	0	0.4	0	7	0	34.41	0	0	0	0	0	4.5	0	0	0	3.21	0	40.13	0	0	0	0	0	0	0	0	0	0	0	0	0	0	0	0	0	0	0	0	0	0	0	0	0	0	0	0	0	0
IMG_2239	0	0	0	0	10.38	0	42.3	0	0	0	0	0	0	0	0	0	2.44	0	36.19	0	0	0	0	0	0	0	0	0	0	0	0	0	0	0	0	0	0	0	0	0	0	0	0.22	0	0	0	0	0	0
IMG_2234	0	0	0	0	60	0	0	0	0	0	0	0	0	0	0	0	20	0	14.88	0	0	0	0	0	0	0	0	0	0	0	0	0	0	0	0	0	0	0	0	0	0	0	0	0	0	0.22	0	0	0
IMG_2228	0	0	0.12	0	2.5	0	44.05	0	0	0	0	0	0	0	0	0	19.36	0	29.61	0	0	0	0	0	0	0	0	0	0	0	0	0	0	0	0	0	0	0	0	0	0	0	0	0	0	1.62	0	0	0
IMG_2226	0	0	0	4.72	30	0	22.42	0.74	0	7.9	0	0	0	0	0	0	1.84	0	30.63	0	0	0	0	0	0	0	0	0	0	0	0	0	0	0	0	0	0	0	0	0	0	0	0	0	0	0	0	0	0
IMG_2945	0	0	0	0	1.5	0	14.5	0	0	2.6	0	0	0	0	0	0.7	37.5	0.13	39.05	0	0	0	0	0	0	0	0	0	0	0	0	0	1.1	0	0	0	0	0	0	0	0	0	0	0	2.6	0	0	0.07	0
IMG_2947	0	0	0	0	9	0	7	0	0	4.3	1.6	0	0	0	0	0	19	0	54.7	0	0	0	0	0	0	0	0	0	3	0	0	0	0	0	0	0	0	0	0.6	0	0	0	0	0	0	0.8	0	0	0
IMG_2948	0	0	0	0	0	0	4	0	0	4.5	1.4	0	0	0	0	0.9	8	0	73.8	0	0	0	0	0	0	0	2.6	0	0	0	0	0	0	0	0	0	0	0	0	0	0	0	0	0	0	0.2	0	0	0
IMG_2952	0	0	0	0	12	0	10	0	0	7	4	0	0	0	0.25	0.31	12.2	0	52.25	0	0	0	0.21	0	0	0	0	0	0	0	0	0	0	0	0	0	0	0	0	0	0	0	0	0	0	0.3	0	0	0
IMG_2953	0	0	0	0	1	0	19	0	0	2	2	0	0	2	0	0	8	0	60.77	2.3	0	0	0	0	0	0	0	0	0	0	0	0	0	0	0	0	0	0	0	0	0	0	0	0	0	0	0	0	0
IMG_2956	0	0	0	0	0	0	16.5	0	0	15.5	3	0	0	1.7	0	0	22	0	39.83	0	0	0	0	0	0	0	0	0	0	0	0	0	0	0	0	0	0	0	0	0	0	0	0	0	0	0	0	0	0
IMG_2957	0	0	0	0	0	0	4	0	0	7.4	0	0	0	0	0	0	13	0	34.44	0	0	0	0	0	0	0	0	0	31	0	0	0	0.66	0	0	0	0	0	0	0	0	0	0	0	0	0	0	0	0
IMG_2960	0	0	0	0	0	0	10.3	0	0	18	0.7	0	0	0	0	0.44	17.2	0	52.52	0	0	0	0	0	0	0	0	0	0	0	0	0	0.22	0	0	0	0	0	0	0	0.22	0	0	0	0	0	0	0	0
IMG_2963	0	0	0	0	0	0	11	0	0	10	1.07	0	0	0	0	1.7	24.6	0	49.88	0	0	0	0	0	0	0	0	0	0.3	0	0	0	0	0	0	0	0	0	0	0	0	0	0	0	0	0.3	0	0.5	0
IMG_2966	0	0	0	0	0	0	14.5	0	0	14	0	0	0	0	0	0	4.2	0	52.16	0	0	0	0	0	0	0	0	0	2.7	0	0	0	0	0	0	0	0	0	0	0	1.7	0	0	0	0	0.4	0	0.09	0
IMG_3002	0	0	0	0	0.8	0	14.5	0	0	0	0	0	0	0	0	0.5	45	0	36.26	0	0	0	0	0	0	0	0	0	0	0	0	0	0	0	0	0	0	0	0	0	0.5	0	0	0	0	0	0	0	0
IMG_3005	0	0	0	0	0	0	15	0	0	0.45	0.51	0	1	0	0	1	64	0	10.63	0	0	0	0	0	0	0	0	0	0	0	0	0	0	0	0	0	0	0	0	0	0.8	0	0	0	0	0.61	0	0	0
IMG_3007	0	0	0	0	0.32	0	23	0	0	5.5	0	0	0	0	0	2.8	63.61	0	1	0	0	0	0	0	0	0	0	0	0	0	0	0	0	0	0	0	0	0	0	0	0	0	0	0	0	0	0	0	0
IMG_3022	0	0	0	0	0	0	24	0	0	0	0	0	0	0	0	0.2	50.4	0	23.41	0	0	0	0	0	0	0	0	0.22	0.23	0	0	0	0	0	0	0	0	0	0	0	0.23	0	0	0	0	0.04	0	0	0
IMG_3011	0	0	0	0	0	0	4.7	0	0	0	0	0	0	0	0	1	37	0.05	50.13	0	0	0	0	0	0	0	0	0	0	0	0	0	0	0	0	0	0	0	0	0	0.5	0	0	0	0	0.06	0	0	0
IMG_3015	0	0	0	0	0	0	30	0	0	0	0	0	0	0	0	0.4	8	0	56.91	0	0	0	0	0	0	0	0	0	0	0	0	0	0	0	0	0	0	0	0	0	0.44	0	0	0	0	0	0	0	0
IMG_3016	0	0	0	0	0.4	0	2	0	0	4.4	0	0	0.2	0	0	0.06	16.6	0	48.46	0	0	0	0	0	0	0	0	0	27	0	0	0	0	0	0	0	0	0	0	0	0	0	0	0	0	0	0	0	0
IMG_3018	0	0	0	0	0	0	21	0	0	0	0.25	0	0	0	0	2.7	33	0	34.28	0	0	0	0	0	0	0	0	0	2.3	2.3	0	0	0	0	0	0	0	0	0	0	0	0	0	0	0	0.5	0	0.5	0
IMG_3025	0	0	0	0	0	0	14	0	0	0	0	0	0	0	0	3.08	26	0.6	46.98	0	0	0	0	0	0	0	0	0	0	0	0	0	0	0	0	0	0	0	0.3	0	1	0	0	0	0	0	0	0.16	0
IMG_3026	0.42	0	0	0	0	0	6.6	0	0	3.7	0	0	0	0	0	0.52	55	0	29.51	0	0	0	0	0	0	0	0	0	0	0	0	0	0	0	0	0	0	0	0	0	0	0	0	0	0	0.12	0	0	0
IMG_3149	0	0	9.7	0	3.2	1.7	15	0	0	0	0	0	0	0	0	0	2.02	0	54.05	7.6	0	0	0	0	0	0	0	0	0	0	0	0	0	0	0	0	0	0	0	0	0	0	0	0	0	0	0	0	0
IMG_3151	0	0	16	0	5	0.7	9	0	0	0	0	0	0	0	0	0	15.5	0	50.28	0	0	0	0.12	0	0	0	0	0	0	0	0	0	0	0	0	0	0	0	0	0	0	0	1.7	0	0	0	0	0	0
IMG_3153	0	0	2.8	0	34	0.6	3	0	0	0.9	0	0	0.18	0	0	0	12	0	39.29	0	0	0	0	0	0	0	0	0	0	0	0	0	0	0	0	0	0	0	0	0	0.18	0	3	0	0	0.08	0	0	0
IMG_3156	0	0	1.05	0	12	0	12	0	0	1	0.1	0	0.46	0	0	0	13	0	54.8	0	0	0	0	0	0	0	0.33	0	0	0	0	0	0	0	0	0	0	0	0	0	0	0	3.7	0	0	0	0	0	0
IMG_3158	0	0	6.6	0	14	10	16	0	0	0	0	0	0	0	0	0	17	0	34.61	0	0	0	0	0	0	0	0	0	0	0	0	0	0	0	0	0	0	0	0	0	0	0	0.55	0	0	0	0	0	0
IMG_3171	0	0	13	0	11	2.5	3	0	0	6.5	0	0	0	0	0	0	2	0	52.5	0	0	0	0	0	0	0	0	0	0	0	0	0	0	0	0	0	0	0	0	0	0	0	3	0	0	0	0	0	0
IMG_3162	1.2	0	3.5	0	0	0.5	21	0	0	1.7	0.08	0	0	0	0	0	21	0	43.58	0	0	0	0	0	0	0	0	0	0	0	0	0	0	0	0	0	0	0	0	0	0	0	0	0	0	0	0	0	0
IMG_3164	0	0	0	0	1	3	17	0	0	2.7	0	0	0	0	0	0	25	0	44.9	0	0	0	0	0	0	0	0	0	0	0	0	0	0	0	0	0	0	0.3	0	0	0.7	0	1.2	0	0	0	0	0	0
IMG_3167	0	0	29	0	0.8	11	10	0	0	0	0	0	0	0	0	0	0.28	0	35.02	11	0	0	0	0	0	0	0	0	0	0	0	0	0	0	0	0	0	0	0	0	0	0	0.6	0	0	0	0	0	0
IMG_3173	0	0	12	0	4	1	2	0	0	0.12	0	0	0	4	0	0	2	0	53.88	0	0	0	0	0	0	0	0	0	0	0	0	0	0	0	0	0	0	0	0	0	0	0	4	0	0	0	0	0	0
IMG_3219	0	0	0.4	0	8	0	16.5	0	0	1.2	0	0	0	0	2.02	0	18	0	43.48	0	0	0	0	0	0	0	0	0	2.5	0	0	0	0	0	0	0	0	0	0.5	0	0	0	0	0.1	0	0	0	0	0
IMG_3222	0	0	0	0	10	0	11	0	0	0	0	0	0	0	0	0	26	0	39.44	0	0	0	0	0	0	0	0	0	0	0	0	0	0	0	0	0	0	0	0.5	0	0	0	0	0.06	0	0	6	0	0
IMG_3223	0	0	13	0	12	0.22	7	0	0	0	0	0	1.7	0	0	0	3	0	28.83	0	0	0	0.24	0	0	0	0	0	0	0	0	0	0	0	0	0	0	0	1.5	0	0	0	0	0	0	0	0	0	0
IMG_3231	0	0	0.8	0	6.3	0	49	0	0	2	0	0	0	0	0	0	1	0	18.4	0	0	0	0	0	0	0	0	0	0	0	0	0	0	0	0	0	0	0	3	0	0	0	0	0	0	0	1.5	0	0
IMG_3234	0	0	6.7	0	2	0.6	5	0	0	1	1.4	0	0.23	0	0	0.15	14	0	47.24	0	0	0	0	0	0	0	1.3	0	11	0	0	0	0	0	0	0	0	0	0	0	1	0	0	0	0	0	0	0	0
IMG_3235	0	0	0	0	8	0.2	4	0	0	0	0	0	0	0	0	0.3	52	0	18.29	0	0	0	0	0	0	0	0	0	5.5	0	0.9	0	0	0	0	0	0	0	1	0	1.5	0	0	0	0	0.1	0	0.06	0
IMG_3237	0	0	0	0	10.5	0	4	0	0	12.1	0.2	0	0	0	0	0	45	0	20.52	3	0	0	0	0	0	0	0	0	0	0	0	0	0	0	0	0	0	0	0	0	0.24	0	0	0	0	0	0	0	0
IMG_3239	0	0	0	0	10	9	3	0.4	0	0	0	0	0	0	0	0	7	0	32.6	0	0	0	0	0	0	0	0	0	32	0	0	0	0	0	0	0	0	0	0	0	0	0	0	0	0	0	0	0	0
IMG_3242	0	0	0.22	0	32	2	5	0	0	1	0.33	0	0.6	0	0	0	20	0	30.08	0	1.8	0	0.2	0	0	0	0	0	0	0	0	0	0	0	0	0	0	0	0	0	0	0	0	0	0	0	0	0	0
IMG_3244	0	0	0	0	17	6	6	0	0	0.25	0	0	1	0	0	0	29	0	26.55	0	0	0	0	0	0	0	0	0	0	0	0	0	0	0	0	0	0	0	0	0	1	0	0	0	0	0	0	0	0
IMG_4163	0	0	0	0	0	0	16	0	0	0	0	0	0	0	0	0	58	0	2.9	0	0	0	0	0	0	0	0	0	0	0	0	0	1	0	0	0	0	0	0	0	1.3	0	0	0	0	0	0	0	0
IMG_4166	0	0	0	0	3	0	25	0	0	0	0	0	0	0	0	0	19	0	16.2	0	0	0	0	0	0	0	0	0	12	0	0	0	0.7	0	0	0.1	0	0	0.3	0	0	0	0	0	0	0.7	0	0	0
IMG_4168	0	0.7	0	0	4	0	39	0	0	0	0	0	0	0	0	0	18	0	16.5	0	0	0	0	0	0	0	0	0	4	0	0	0	1	0	0	0	0	0	1	0	0.5	0	0	0	0	0	0	0	0
IMG_4169	0	0	0	0	1	0	72	0	0	0	0	0	0	0	0	0	11	0	4	0	0	0	0	0	0	0	0	0	0	0	0.5	0	0.7	0	0	0	0	0	0	0	0	0	0	0.06	0	0	0	0	0
IMG_4172	0	0	0	0	0	0	71	0	0	0	0	0	0	0	0	0	9	0	12	0	0	0	0	0	0	0	0	0	0	0	0	0	0	0	0	1	0	0	0	0	0	0	0	0	0	0	0	0	0
IMG_4174	0	0	0	0	2.2	0	24	0	0	0	0	0	0	0	0	0	43	0	2	0	0	0	0	0	0	0	0	0	0	0	0	0	3.8	0	0	0	0	0	0	0	0	0	0	0	0	0	0	0	0
IMG_4176	0	0.2	0	0	0	0	76	0	0	0	0	0	0	0	0	0	8	0	10	0	0	0	0	0	0	0	0	0	0	0	0	0	0	0	0	1.5	0	0	0	0	0	0	0	0	0	0	0	0	0
IMG_4177	0	0	0	0	0	0	47.5	0	0	0	0	0	0	0	0	0	26.5	0	14	0	0	0	0	0	0	0	0	0	2.5	0	0	0	0	0	0	0.2	0	0	0	0	3.5	0	0	0	0	0	0	0	0
IMG_4182	0	0	0	0	0	0	30	0	0	0	0	0	0	0	0	0	36	0	8	0	3	1.5	0	0	0	0	0	0	1	0	0	0	1.5	0	0	0.3	0	0	2.5	0	0	0	0	0	0	0	0	0	0
IMG_4184	0	0	0	0	0	0	45	0	0	0	0	0	0	0	0	0	20.5	0	5	0	0	0	0	0	0	0	0	0	0	0	0	0	0.7	0	0	0	8	0	0	0	2.6	0	0	0	0	0	0	0.5	0
IMG_3804	0	0	0	0	0	0	72	0.5	0	0	0	0	0	0	0	0	8	0	1	0	0	0	0	0	0	0	0	0	2	0	0	0	1	0	0	0	0	0	0	0	0	0	0	0.06	0	0	0	0	0
IMG_3806	0	0	0	0	0	0	43.5	0	0	0	0	0	0	0	0	0	29	0	2.6	0	0	0	0.6	0	0	0	0	0	0	0	0	0	0.6	0	0.4	0	0	0	1	0	1	0	0	0	0	0	0	0	0
IMG_3807	0	0	0	0	0	0	83	0	0	0	0	0	0	0	0	0	2.5	0	1.5	0	0	0	0	0	0	0	0	0	0	0	0	0	0	0	0	0	0	0	0	0	0	0	0	0.07	0	0	0	0	0
IMG_3809	0	0	0	0	0	0	8	0	0	0	0	0	0	0	0	0	26	0	4.5	0	0.7	0	0	0	0	0	0	0	29	0	0	0	1.1	0	0	0.6	0	0	11.1	0	3.1	0	0	0	0	0	0	0	0
IMG_3811	0	0	0	0	0	0	10.5	0	0	0	0	0	0	0	0	0	22.5	0	7.5	0	1	1	0	0	0	0	0	0.6	0	0	0	0	0.7	0	1	0	0	0	8.8	0	10.2	0	0	0	0	0	0	0	0
IMG_3813	0	0	0	0	1	0	17.5	0	0	0	0	0	0	0	0	0	30	0	18	0	0	0	0	0	0	0	0	0	17	0	0	0	0	0	0	0	0	0	1	0	2	0	0	0	0	0	0	0	0
IMG_3816	0	0	0	0	0	0	76	0	0	0	0	0	0	0	0	0	8.5	0	1	0	0	0	0	0	0	0	0	0	2.5	0	0	0	0	0	0	0.1	0	0	0	0	0	0	0	0	0	0	0	0	0
IMG_3818	0	0	0	0	1	0	46	0	0	0	0	0	0	0	0	0	17	0	21.65	0	0	0	0.1	0	0	0	0	0	0	0	0	0	0	0	0	0	0	0	1	0	0	0	0	0	0	0	0	0	0
IMG_3821	0	0	0	0	0	0	44	0	0	0	0	0	0	0	0	0	13	0	23.2	0	0	0	0	0	0	0	0	0	0	0	0	0	0	0	0	0	0	0	0	0	0	0.3	0	0	0	0	0	0	0
IMG_3823	0	0	0	0	0	0	27.5	0	0	0	0	0	0	0	0	0	39	0	9.3	0	0	0	0	0	0	0	0	0	16	0	0	0	0	0	0	0	0	0	0	0	0	0	0	0	0	0	0	0	0
[truncated: 14 more columns]

## Sheet: Data_factors
quadrat	locality	site	forest	locsitfo
IMG_0757	Ischia	A	out	Ischia_A_out
IMG_0758	Ischia	A	out	Ischia_A_out
IMG_0759	Ischia	A	out	Ischia_A_out
IMG_0761	Ischia	A	out	Ischia_A_out
IMG_0764	Ischia	A	out	Ischia_A_out
IMG_0766	Ischia	A	out	Ischia_A_out
IMG_0769	Ischia	A	out	Ischia_A_out
IMG_0772	Ischia	A	out	Ischia_A_out
IMG_0773	Ischia	A	out	Ischia_A_out
IMG_0775	Ischia	A	out	Ischia_A_out
IMG_0813	Ischia	B	out	Ischia_B_out
IMG_0814	Ischia	B	out	Ischia_B_out
IMG_0816	Ischia	B	out	Ischia_B_out
IMG_0817	Ischia	B	out	Ischia_B_out
IMG_0818	Ischia	B	out	Ischia_B_out
IMG_0819	Ischia	B	out	Ischia_B_out
IMG_0820	Ischia	B	out	Ischia_B_out
IMG_0821	Ischia	B	out	Ischia_B_out
IMG_0822	Ischia	B	out	Ischia_B_out
IMG_0823	Ischia	B	out	Ischia_B_out
IMG_0843	Procida	A	out	Procida_A_out
IMG_0845	Procida	A	out	Procida_A_out
IMG_0847	Procida	A	out	Procida_A_out
IMG_0850	Procida	A	out	Procida_A_out
IMG_0852	Procida	A	out	Procida_A_out
IMG_0854	Procida	A	out	Procida_A_out
IMG_0856	Procida	A	out	Procida_A_out
IMG_0857	Procida	A	out	Procida_A_out
IMG_0862	Procida	A	out	Procida_A_out
IMG_0863	Procida	A	out	Procida_A_out
IMG_0913	Procida	B	out	Procida_B_out
IMG_0914	Procida	B	out	Procida_B_out
IMG_0917	Procida	B	out	Procida_B_out
IMG_0918	Procida	B	out	Procida_B_out
IMG_0920	Procida	B	out	Procida_B_out
IMG_0922	Procida	B	out	Procida_B_out
IMG_0924	Procida	B	out	Procida_B_out
IMG_0931	Procida	B	out	Procida_B_out
IMG_0932	Procida	B	out	Procida_B_out
IMG_0928	Procida	B	out	Procida_B_out
IMG_2080	Penna	A	out	Penna_A_out
IMG_2081	Penna	A	out	Penna_A_out
IMG_2085	Penna	A	out	Penna_A_out
IMG_2087	Penna	A	out	Penna_A_out
IMG_2090	Penna	A	out	Penna_A_out
IMG_2091	Penna	A	out	Penna_A_out
IMG_2093	Penna	A	out	Penna_A_out
IMG_2095	Penna	A	out	Penna_A_out
IMG_2102	Penna	A	out	Penna_A_out
IMG_2103	Penna	A	out	Penna_A_out
IMG_2197	Penna	B	out	Penna_B_out
IMG_2198	Penna	B	out	Penna_B_out
IMG_2203	Penna	B	out	Penna_B_out
IMG_2207	Penna	B	out	Penna_B_out
IMG_2209	Penna	B	out	Penna_B_out
IMG_2210	Penna	B	out	Penna_B_out
IMG_2214	Penna	B	out	Penna_B_out
IMG_2217	Penna	B	out	Penna_B_out
IMG_2200	Penna	B	out	Penna_B_out
IMG_2205	Penna	B	out	Penna_B_out
IMG_2919	Capri	A	out	Capri_A_out
IMG_2921	Capri	A	out	Capri_A_out
IMG_2923	Capri	A	out	Capri_A_out
IMG_2926	Capri	A	out	Capri_A_out
IMG_2930	Capri	A	out	Capri_A_out
IMG_2931	Capri	A	out	Capri_A_out
IMG_2934	Capri	A	out	Capri_A_out
IMG_2937	Capri	A	out	Capri_A_out
IMG_2939	Capri	A	out	Capri_A_out
IMG_2927	Capri	A	out	Capri_A_out
IMG_2978	Capri	B	out	Capri_B_out
IMG_2981	Capri	B	out	Capri_B_out
IMG_2983	Capri	B	out	Capri_B_out
IMG_2999	Capri	B	out	Capri_B_out
IMG_2986	Capri	B	out	Capri_B_out
IMG_2991	Capri	B	out	Capri_B_out
IMG_2992	Capri	B	out	Capri_B_out
IMG_2995	Capri	B	out	Capri_B_out
IMG_2997	Capri	B	out	Capri_B_out
IMG_3000	Capri	B	out	Capri_B_out
IMG_3128	Vervece	A	out	Vervece_A_out
IMG_3129	Vervece	A	out	Vervece_A_out
IMG_3131	Vervece	A	out	Vervece_A_out
IMG_3133	Vervece	A	out	Vervece_A_out
IMG_3135	Vervece	A	out	Vervece_A_out
IMG_3137	Vervece	A	out	Vervece_A_out
IMG_3139	Vervece	A	out	Vervece_A_out
IMG_3142	Vervece	A	out	Vervece_A_out
IMG_3143	Vervece	A	out	Vervece_A_out
IMG_3147	Vervece	A	out	Vervece_A_out
IMG_3211	Vervece	B	out	Vervece_B_out
IMG_3213	Vervece	B	out	Vervece_B_out
IMG_3195	Vervece	B	out	Vervece_B_out
IMG_3197	Vervece	B	out	Vervece_B_out
IMG_3200	Vervece	B	out	Vervece_B_out
IMG_3201	Vervece	B	out	Vervece_B_out
IMG_3203	Vervece	B	out	Vervece_B_out
IMG_3206	Vervece	B	out	Vervece_B_out
IMG_3208	Vervece	B	out	Vervece_B_out
IMG_3192	Vervece	B	out	Vervece_B_out
IMG_4215	Banco	A	out	Banco_A_out
IMG_4222	Banco	A	out	Banco_A_out
IMG_4224	Banco	A	out	Banco_A_out
IMG_4226	Banco	A	out	Banco_A_out
IMG_4227	Banco	A	out	Banco_A_out
IMG_4232	Banco	A	out	Banco_A_out
IMG_4234	Banco	A	out	Banco_A_out
IMG_4236	Banco	A	out	Banco_A_out
IMG_4237	Banco	A	out	Banco_A_out
IMG_4240	Banco	A	out	Banco_A_out
IMG_3769	Banco	B	out	Banco_B_out
IMG_3771	Banco	B	out	Banco_B_out
IMG_3772	Banco	B	out	Banco_B_out
IMG_3776	Banco	B	out	Banco_B_out
IMG_3778	Banco	B	out	Banco_B_out
IMG_3781	Banco	B	out	Banco_B_out
IMG_3783	Banco	B	out	Banco_B_out
IMG_3785	Banco	B	out	Banco_B_out
IMG_3788	Banco	B	out	Banco_B_out
IMG_3790	Banco	B	out	Banco_B_out
IMG_0779	Ischia	A	in	Ischia_A_in
IMG_0780	Ischia	A	in	Ischia_A_in
IMG_0782	Ischia	A	in	Ischia_A_in
IMG_0785	Ischia	A	in	Ischia_A_in
IMG_0786	Ischia	A	in	Ischia_A_in
IMG_0788	Ischia	A	in	Ischia_A_in
IMG_0041	Ischia	A	in	Ischia_A_in
IMG_0792	Ischia	A	in	Ischia_A_in
IMG_0795	Ischia	A	in	Ischia_A_in
IMG_0796	Ischia	A	in	Ischia_A_in
IMG_0827	Ischia	B	in	Ischia_B_in
IMG_0828	Ischia	B	in	Ischia_B_in
IMG_0829	Ischia	B	in	Ischia_B_in
IMG_0833	Ischia	B	in	Ischia_B_in
IMG_0835	Ischia	B	in	Ischia_B_in
IMG_0836	Ischia	B	in	Ischia_B_in
IMG_0837	Ischia	B	in	Ischia_B_in
IMG_0841	Ischia	B	in	Ischia_B_in
IMG_0842	Ischia	B	in	Ischia_B_in
IMG_0839	Ischia	B	in	Ischia_B_in
IMG_0892	Procida	A	in	Procida_A_in
IMG_0890	Procida	A	in	Procida_A_in
IMG_0886	Procida	A	in	Procida_A_in
IMG_0883	Procida	A	in	Procida_A_in
IMG_0881	Procida	A	in	Procida_A_in
IMG_0879	Procida	A	in	Procida_A_in
IMG_0871	Procida	A	in	Procida_A_in
IMG_0869	Procida	A	in	Procida_A_in
IMG_0888	Procida	A	in	Procida_A_in
IMG_0872	Procida	A	in	Procida_A_in
IMG_0938	Procida	B	in	Procida_B_in
IMG_0940	Procida	B	in	Procida_B_in
IMG_0946	Procida	B	in	Procida_B_in
IMG_0949	Procida	B	in	Procida_B_in
IMG_0957	Procida	B	in	Procida_B_in
IMG_0947	Procida	B	in	Procida_B_in
IMG_0951	Procida	B	in	Procida_B_in
IMG_0952	Procida	B	in	Procida_B_in
IMG_0935	Procida	B	in	Procida_B_in
IMG_0941	Procida	B	in	Procida_B_in
IMG_2107	Penna	A	in	Penna_A_in
IMG_2110	Penna	A	in	Penna_A_in
IMG_2112	Penna	A	in	Penna_A_in
IMG_2115	Penna	A	in	Penna_A_in
IMG_2116	Penna	A	in	Penna_A_in
IMG_2121	Penna	A	in	Penna_A_in
IMG_2123	Penna	A	in	Penna_A_in
IMG_2125	Penna	A	in	Penna_A_in
IMG_2127	Penna	A	in	Penna_A_in
IMG_2132	Penna	A	in	Penna_A_in
IMG_2246	Penna	B	in	Penna_B_in
IMG_2247	Penna	B	in	Penna_B_in
IMG_2248	Penna	B	in	Penna_B_in
IMG_2249	Penna	B	in	Penna_B_in
IMG_2245	Penna	B	in	Penna_B_in
IMG_2241	Penna	B	in	Penna_B_in
IMG_2239	Penna	B	in	Penna_B_in
IMG_2234	Penna	B	in	Penna_B_in
IMG_2228	Penna	B	in	Penna_B_in
IMG_2226	Penna	B	in	Penna_B_in
IMG_2945	Capri	A	in	Capri_A_in
IMG_2947	Capri	A	in	Capri_A_in
IMG_2948	Capri	A	in	Capri_A_in
IMG_2952	Capri	A	in	Capri_A_in
IMG_2953	Capri	A	in	Capri_A_in
IMG_2956	Capri	A	in	Capri_A_in
IMG_2957	Capri	A	in	Capri_A_in
IMG_2960	Capri	A	in	Capri_A_in
IMG_2963	Capri	A	in	Capri_A_in
IMG_2966	Capri	A	in	Capri_A_in
IMG_3002	Capri	B	in	Capri_B_in
IMG_3005	Capri	B	in	Capri_B_in
IMG_3007	Capri	B	in	Capri_B_in
IMG_3022	Capri	B	in	Capri_B_in
IMG_3011	Capri	B	in	Capri_B_in
IMG_3015	Capri	B	in	Capri_B_in
IMG_3016	Capri	B	in	Capri_B_in
IMG_3018	Capri	B	in	Capri_B_in
IMG_3025	Capri	B	in	Capri_B_in
IMG_3026	Capri	B	in	Capri_B_in
IMG_3149	Vervece	A	in	Vervece_A_in
IMG_3151	Vervece	A	in	Vervece_A_in
IMG_3153	Vervece	A	in	Vervece_A_in
IMG_3156	Vervece	A	in	Vervece_A_in
IMG_3158	Vervece	A	in	Vervece_A_in
IMG_3171	Vervece	A	in	Vervece_A_in
IMG_3162	Vervece	A	in	Vervece_A_in
IMG_3164	Vervece	A	in	Vervece_A_in
IMG_3167	Vervece	A	in	Vervece_A_in
IMG_3173	Vervece	A	in	Vervece_A_in
IMG_3219	Vervece	B	in	Vervece_B_in
IMG_3222	Vervece	B	in	Vervece_B_in
IMG_3223	Vervece	B	in	Vervece_B_in
IMG_3231	Vervece	B	in	Vervece_B_in
IMG_3234	Vervece	B	in	Vervece_B_in
IMG_3235	Vervece	B	in	Vervece_B_in
IMG_3237	Vervece	B	in	Vervece_B_in
IMG_3239	Vervece	B	in	Vervece_B_in
IMG_3242	Vervece	B	in	Vervece_B_in
IMG_3244	Vervece	B	in	Vervece_B_in
IMG_4163	Banco	A	in	Banco_A_in
IMG_4166	Banco	A	in	Banco_A_in
IMG_4168	Banco	A	in	Banco_A_in
IMG_4169	Banco	A	in	Banco_A_in
IMG_4172	Banco	A	in	Banco_A_in
IMG_4174	Banco	A	in	Banco_A_in
IMG_4176	Banco	A	in	Banco_A_in
IMG_4177	Banco	A	in	Banco_A_in
IMG_4182	Banco	A	in	Banco_A_in
IMG_4184	Banco	A	in	Banco_A_in
IMG_3804	Banco	B	in	Banco_B_in
IMG_3806	Banco	B	in	Banco_B_in
IMG_3807	Banco	B	in	Banco_B_in
IMG_3809	Banco	B	in	Banco_B_in
IMG_3811	Banco	B	in	Banco_B_in
IMG_3813	Banco	B	in	Banco_B_in
IMG_3816	Banco	B	in	Banco_B_in
IMG_3818	Banco	B	in	Banco_B_in
IMG_3821	Banco	B	in	Banco_B_in
IMG_3823	Banco	B	in	Banco_B_in

## Sheet: Data_FEs_species
Species	FE
Agelas.oroides	3k4313ac22dc
Aglaophenia.spp	3g3323ad22dc
Amphiroa.complex	1f3211da22ba
Aplysina.cavernicola	3j5413ac21dc
Axinella.damicornis	3k4313ac21dc
Axinella.spp	3l4313ac21dc
Axinella.vaceleti	3j4213ac21dc
Axinella.verrucosa	3l4313ac21dc
Botryocladia.botryoides	1m3211da23aa
Bugula.sp	3g2313ab24dc
Caryophyllia.smithii	1h4113ad21db
Caulerpa.cylindracea	3d3311ba24ca
Cerianthus.membranaceus	1j5513ad22db
Chondrilla.nucula	3i4312ec24dc
Chondrosia.reniformis	3i4413ac22dc
Clathrina.clathrus	3i4323ac21dc
Clavelina.dellavallei	2j2223ac22cc
Clavelina.sp	2j2223ac22cc
Cliona.celata	3a4413ac23dc
Cliona.viridis	3a4412fc23dc
Codium.bursa	1k3411ba23aa
Colpomenia.sp	1k2321ca23aa
Crella.elegans	3i4413ac21bc
Crella.pulvinar	3b4313ac21bc
Dictyopteris.polypodioides	1e2421ca23ca
Dictyotales	1e2321ca23ca
Didemnum.sp	3b3323ac24cc
Diplosoma.spongiforme	3b3323ac24cc
Disydea.fragilis	3i4323ac23dc
Dysidea.avara	3i4323ac23dc
Encrusting.ascidians	3b3323ac24cc
Encrusting.bryozoans	3b3213ab22bc
Encrusting.Calcified.Rhodophyta	3b5311da12ba
Encrusting.red.sponges	3b4423ac22dc
Encrusting.sponges.1	3b4313ac21dc
Encrusting.sponges.10	3b4313ac21dc
Encrusting.sponges.2	3b4313ac21dc
Encrusting.sponges.3	3b4313ac21dc
Encrusting.sponges.4	3b4313ac21dc
Encrusting.sponges.5	3b4313ac21dc
Encrusting.sponges.6	3b4313ac21dc
Encrusting.sponges.7	3b4313ac21dc
Encrusting.sponges.8	3b4313ac21dc
Encrusting.sponges.9	3b4313ac21dc
Eudendrium.sp	3g3323ad24dc
Eunicella.cavolini	3l4513ad22dc
Filamentous.green.algae	1c2211ba24aa
Filograna.implexa	2k4423ab23bc
Flabellia.petiolata	1d3321ba23aa
Frondipora.verrucosa	3j3223ab22bc
Haliclona.fulva	3i5313ac21dc
Halimeda.tuna	2d2311ba23aa
Halisarca.sp	3b2213ac21dc
Halocynthia.papillosa	1j4313ac21ac
Hemimycale.columella	3b3313ac22dc
Hexadella.racovitzai	3b4413ac21dc
Laurencia.complex	1g2321da23aa
Leptopsammia.pruvoti	1h4113ad21dc
Lophocladia.trichoclados	1c2521da24ca
Myriapora.truncata	3l3313ab22dc
Oscarella.lobularis	3i4323ac22dc
Padina.pavonica	1e3311ca23ba
Palmophyllum.crassum	3b3311ba23aa
Parazoanthus.axinellae	3i4223ad22db
Peyssonellia.spp	3b3321da22ba
Phorbas.tenacior	3b4313ac21dc
Phyllariopsis.brevipes	1l4511ca14ca
Pleraplysilla.spinifera	3b4323ac21dc
Poecilosclerida.sp	3b4313ac21dc
Protula.sp	1b4313ab23bb
Reteporella.sp	3j3313ab22bc
Savignyella.lafontii	3g3323ab22bc
Schizomavella.mamillata	3b3323ab22bc
Sertularella.sp	3g3323ad22dc
Smittina.complex	3l3323ab22bc
Terpios.fugax	3b4213ac21bc
Turf	1c2121ga24ca
Valonia.spp	2m2221ba23aa
Vermetids	2b4313ad13bc
Zanardina.spp	1b3321ca23ca

## Sheet: Data_FEs
FE	Coloniality	Morphology	Maximum longevity	Size	Epibiosis	Energetic resource	Major photos. pigment	Feeding strategy	Potential of asexual reproduction	Growth rates	Defenses	Propagules
3k4313ac22dc	3	k	4	3	1	3	a	c	2	2	d	c
3g3323ad22dc	3	g	3	3	2	3	a	d	2	2	d	c
1f3211da22ba	1	f	3	2	1	1	d	a	2	2	b	a
3j5413ac21dc	3	j	5	4	1	3	a	c	2	1	d	c
3k4313ac21dc	3	k	4	3	1	3	a	c	2	1	d	c
3l4313ac21dc	3	l	4	3	1	3	a	c	2	1	d	c
3j4213ac21dc	3	j	4	2	1	3	a	c	2	1	d	c
1m3211da23aa	1	m	3	2	1	1	d	a	2	3	a	a
3g2313ab24dc	3	g	2	3	1	3	a	b	2	4	d	c
1h4113ad21db	1	h	4	1	1	3	a	d	2	1	d	b
3d3311ba24ca	3	d	3	3	1	1	b	a	2	4	c	a
1j5513ad22db	1	j	5	5	1	3	a	d	2	2	d	b
3i4312ec24dc	3	i	4	3	1	2	e	c	2	4	d	c
3i4413ac22dc	3	i	4	4	1	3	a	c	2	2	d	c
3i4323ac21dc	3	i	4	3	2	3	a	c	2	1	d	c
2j2223ac22cc	2	j	2	2	2	3	a	c	2	2	c	c
3a4413ac23dc	3	a	4	4	1	3	a	c	2	3	d	c
3a4412fc23dc	3	a	4	4	1	2	f	c	2	3	d	c
1k3411ba23aa	1	k	3	4	1	1	b	a	2	3	a	a
1k2321ca23aa	1	k	2	3	2	1	c	a	2	3	a	a
3i4413ac21bc	3	i	4	4	1	3	a	c	2	1	b	c
3b4313ac21bc	3	b	4	3	1	3	a	c	2	1	b	c
1e2421ca23ca	1	e	2	4	2	1	c	a	2	3	c	a
1e2321ca23ca	1	e	2	3	2	1	c	a	2	3	c	a
3b3323ac24cc	3	b	3	3	2	3	a	c	2	4	c	c
3i4323ac23dc	3	i	4	3	2	3	a	c	2	3	d	c
3b3213ab22bc	3	b	3	2	1	3	a	b	2	2	b	c
3b5311da12ba	3	b	5	3	1	1	d	a	1	2	b	a
3b4423ac22dc	3	b	4	4	2	3	a	c	2	2	d	c
3b4313ac21dc	3	b	4	3	1	3	a	c	2	1	d	c
3g3323ad24dc	3	g	3	3	2	3	a	d	2	4	d	c
3l4513ad22dc	3	l	4	5	1	3	a	d	2	2	d	c
1c2211ba24aa	1	c	2	2	1	1	b	a	2	4	a	a
2k4423ab23bc	2	k	4	4	2	3	a	b	2	3	b	c
1d3321ba23aa	1	d	3	3	2	1	b	a	2	3	a	a
3j3223ab22bc	3	j	3	2	2	3	a	b	2	2	b	c
3i5313ac21dc	3	i	5	3	1	3	a	c	2	1	d	c
2d2311ba23aa	2	d	2	3	1	1	b	a	2	3	a	a
3b2213ac21dc	3	b	2	2	1	3	a	c	2	1	d	c
1j4313ac21ac	1	j	4	3	1	3	a	c	2	1	a	c
3b3313ac22dc	3	b	3	3	1	3	a	c	2	2	d	c
3b4413ac21dc	3	b	4	4	1	3	a	c	2	1	d	c
1g2321da23aa	1	g	2	3	2	1	d	a	2	3	a	a
1h4113ad21dc	1	h	4	1	1	3	a	d	2	1	d	c
1c2521da24ca	1	c	2	5	2	1	d	a	2	4	c	a
3l3313ab22dc	3	l	3	3	1	3	a	b	2	2	d	c
3i4323ac22dc	3	i	4	3	2	3	a	c	2	2	d	c
1e3311ca23ba	1	e	3	3	1	1	c	a	2	3	b	a
3b3311ba23aa	3	b	3	3	1	1	b	a	2	3	a	a
3i4223ad22db	3	i	4	2	2	3	a	d	2	2	d	b
3b3321da22ba	3	b	3	3	2	1	d	a	2	2	b	a
1l4511ca14ca	1	l	4	5	1	1	c	a	1	4	c	a
3b4323ac21dc	3	b	4	3	2	3	a	c	2	1	d	c
1b4313ab23bb	1	b	4	3	1	3	a	b	2	3	b	b
3j3313ab22bc	3	j	3	3	1	3	a	b	2	2	b	c
3g3323ab22bc	3	g	3	3	2	3	a	b	2	2	b	c
3b3323ab22bc	3	b	3	3	2	3	a	b	2	2	b	c
3l3323ab22bc	3	l	3	3	2	3	a	b	2	2	b	c
3b4213ac21bc	3	b	4	2	1	3	a	c	2	1	b	c
1c2121ga24ca	1	c	2	1	2	1	g	a	2	4	c	a
2m2221ba23aa	2	m	2	2	2	1	b	a	2	3	a	a
2b4313ad13bc	2	b	4	3	1	3	a	d	1	3	b	c
1b3321ca23ca	1	b	3	3	2	1	c	a	2	3	c	a

## Sheet: Species_traits
	Coloniality	Morphology	Maximum longevity	Size	Epibiosis	Energetic resource	Major photos. pigment	Feeding strategy	Potential of asexual reproduction	Growth rates	Defenses	Propagules
Agelas.oroides	3	k	4	3	1	3	a	c	2	2	d	c
Aglaophenia.spp	3	g	3	3	2	3	a	d	2	2	d	c
Amphiroa.complex	1	f	3	2	1	1	d	a	2	2	b	a
Aplysina.cavernicola	3	j	5	4	1	3	a	c	2	1	d	c
Axinella.damicornis	3	k	4	3	1	3	a	c	2	1	d	c
Axinella.spp	3	l	4	3	1	3	a	c	2	1	d	c
Axinella.vaceleti	3	j	4	2	1	3	a	c	2	1	d	c
Axinella.verrucosa	3	l	4	3	1	3	a	c	2	1	d	c
Botryocladia.botryoides	1	m	3	2	1	1	d	a	2	3	a	a
Bugula.sp	3	g	2	3	1	3	a	b	2	4	d	c
Caryophyllia.smithii	1	h	4	1	1	3	a	d	2	1	d	b
Caulerpa.cylindracea	3	d	3	3	1	1	b	a	2	4	c	a
Cerianthus.membranaceus	1	j	5	5	1	3	a	d	2	2	d	b
Chondrilla.nucula	3	i	4	3	1	2	e	c	2	4	d	c
Chondrosia.reniformis	3	i	4	4	1	3	a	c	2	2	d	c
Clathrina.clathrus	3	i	4	3	2	3	a	c	2	1	d	c
Clavelina.dellavallei	2	j	2	2	2	3	a	c	2	2	c	c
Clavelina.sp	2	j	2	2	2	3	a	c	2	2	c	c
Cliona.celata	3	a	4	4	1	3	a	c	2	3	d	c
Cliona.viridis	3	a	4	4	1	2	f	c	2	3	d	c
Codium.bursa	1	k	3	4	1	1	b	a	2	3	a	a
Colpomenia.sp	1	k	2	3	2	1	c	a	2	3	a	a
Crella.elegans	3	i	4	4	1	3	a	c	2	1	b	c
Crella.pulvinar	3	b	4	3	1	3	a	c	2	1	b	c
Dictyopteris.polypodioides	1	e	2	4	2	1	c	a	2	3	c	a
Dictyotales	1	e	2	3	2	1	c	a	2	3	c	a
Didemnum.sp	3	b	3	3	2	3	a	c	2	4	c	c
Diplosoma.spongiforme	3	b	3	3	2	3	a	c	2	4	c	c
Disydea.fragilis	3	i	4	3	2	3	a	c	2	3	d	c
Dysidea.avara	3	i	4	3	2	3	a	c	2	3	d	c
Encrusting.ascidians	3	b	3	3	2	3	a	c	2	4	c	c
Encrusting.bryozoans	3	b	3	2	1	3	a	b	2	2	b	c
Encrusting.Calcified.Rhodophyta	3	b	5	3	1	1	d	a	1	2	b	a
Encrusting.red.sponges	3	b	4	4	2	3	a	c	2	2	d	c
Encrusting.sponges.1	3	b	4	3	1	3	a	c	2	1	d	c
Encrusting.sponges.10	3	b	4	3	1	3	a	c	2	1	d	c
Encrusting.sponges.2	3	b	4	3	1	3	a	c	2	1	d	c
Encrusting.sponges.3	3	b	4	3	1	3	a	c	2	1	d	c
Encrusting.sponges.4	3	b	4	3	1	3	a	c	2	1	d	c
Encrusting.sponges.5	3	b	4	3	1	3	a	c	2	1	d	c
Encrusting.sponges.6	3	b	4	3	1	3	a	c	2	1	d	c
Encrusting.sponges.7	3	b	4	3	1	3	a	c	2	1	d	c
Encrusting.sponges.8	3	b	4	3	1	3	a	c	2	1	d	c
Encrusting.sponges.9	3	b	4	3	1	3	a	c	2	1	d	c
Eudendrium.sp	3	g	3	3	2	3	a	d	2	4	d	c
Eunicella.cavolini	3	l	4	5	1	3	a	d	2	2	d	c
Filamentous.green.algae	1	c	2	2	1	1	b	a	2	4	a	a
Filograna.implexa	2	k	4	4	2	3	a	b	2	3	b	c
Flabellia.petiolata	1	d	3	3	2	1	b	a	2	3	a	a
Frondipora.verrucosa	3	j	3	2	2	3	a	b	2	2	b	c
Haliclona.fulva	3	i	5	3	1	3	a	c	2	1	d	c
Halimeda.tuna	2	d	2	3	1	1	b	a	2	3	a	a
Halisarca.sp	3	b	2	2	1	3	a	c	2	1	d	c
Halocynthia.papillosa	1	j	4	3	1	3	a	c	2	1	a	c
Hemimycale.columella	3	b	3	3	1	3	a	c	2	2	d	c
Hexadella.racovitzai	3	b	4	4	1	3	a	c	2	1	d	c
Laurencia.complex	1	g	2	3	2	1	d	a	2	3	a	a
Leptopsammia.pruvoti	1	h	4	1	1	3	a	d	2	1	d	c
Lophocladia.trichoclados	1	c	2	5	2	1	d	a	2	4	c	a
Myriapora.truncata	3	l	3	3	1	3	a	b	2	2	d	c
Oscarella.lobularis	3	i	4	3	2	3	a	c	2	2	d	c
Padina.pavonica	1	e	3	3	1	1	c	a	2	3	b	a
Palmophyllum.crassum	3	b	3	3	1	1	b	a	2	3	a	a
Parazoanthus.axinellae	3	i	4	2	2	3	a	d	2	2	d	b
Peyssonellia.spp	3	b	3	3	2	1	d	a	2	2	b	a
Phorbas.tenacior	3	b	4	3	1	3	a	c	2	1	d	c
Phyllariopsis.brevipes	1	l	4	5	1	1	c	a	1	4	c	a
Pleraplysilla.spinifera	3	b	4	3	2	3	a	c	2	1	d	c
Poecilosclerida.sp	3	b	4	3	1	3	a	c	2	1	d	c
Protula.sp	1	b	4	3	1	3	a	b	2	3	b	b
Reteporella.sp	3	j	3	3	1	3	a	b	2	2	b	c
Savignyella.lafontii	3	g	3	3	2	3	a	b	2	2	b	c
Schizomavella.mamillata	3	b	3	3	2	3	a	b	2	2	b	c
Sertularella.sp	3	g	3	3	2	3	a	d	2	2	d	c
Smittina.complex	3	l	3	3	2	3	a	b	2	2	b	c
Terpios.fugax	3	b	4	2	1	3	a	c	2	1	b	c
Turf	1	c	2	1	2	1	g	a	2	4	c	a
Valonia.spp	2	m	2	2	2	1	b	a	2	3	a	a
Vermetids	2	b	4	3	1	3	a	d	1	3	b	c
Zanardina.spp	1	b	3	3	2	1	c	a	2	3	c	a
